# Supplementary material for: Facile access to chiral γ-butyrolactones via rhodium-catalysed asymmetric hydrogenation of γ-butenolides and γ-hydroxybutenolides
Source: Royal Society of Chemistry journal article supplement (doi:10.1039/d3sc00491k), 2023-01-01
Supplement: d3sc00491k1.pdf [file d3sc00491k1.pdf]

## Supporting Information

### **Facile Asymmetric Hydrogenation of $\gamma$ -Butenolides and $\gamma$ -Hydroxybutenolides to Prepare Chiral $\gamma$ -Butyrolactones**

Yuxuan Zhou, § Siyuan Guo, § Qiwei Lang\*, Geng-Qiang Chen\*, Xumu Zhang\*

§ Y.Z. and S.G. contributed equally

# Content

|                                                                                        |    |
|----------------------------------------------------------------------------------------|----|
| 1. General Information .....                                                           | 3  |
| 2. General Procedure A of Hydrogenation of $\gamma$ -Butenolides <b>1</b> .....        | 5  |
| 3. Additive Screening for Hydrogenation of $\gamma$ -Hydroxybutenolides <b>3a</b> .... | 6  |
| 4. General Procedure B of Hydrogenation of $\gamma$ -Hydroxybutenolides <b>3</b> ..... | 7  |
| 5. Synthetic Applications .....                                                        | 19 |
| 6. NMR Spectra .....                                                                   | 24 |
| 7. HPLC Spectra.....                                                                   | 39 |
| 8. GC Spectra .....                                                                    | 52 |
| 9. References .....                                                                    | 54 |

## 1. General Information

All anhydrous reactions were performed in oven-dried round-bottomed flasks under a positive pressure of dry argon. Air- and moisture-sensitive compounds were introduced via syringes or cannula using standard inert atmosphere techniques. Unless otherwise noted, all reagents and solvents were purchased from commercial suppliers without further purification. Anhydrous solvents were purchased from J&K.  $\gamma$ -Butenolides **1a-n**, **1n'** and  $\gamma$ -hydroxybutenolides **3** were purchased from Bide pharm or prepared according to literature reports.<sup>1-5</sup>  $\gamma$ -Butenolide **1o** was purchased from Energy Chemical, and **1p** was purchased from Chemsy Shanghai. For heating, an oil bath was used. Reactions were monitored by thin-layer chromatography (TLC) using Yantai Huayang silica gel plates, T-HSGF5025025, with a 0.23 mm thickness. Components were visualized by illumination with short-wavelength ultraviolet light and/or staining. Nylon-66 membrane syringe filters were purchase from Tianjin Jinteng. Flash column chromatography was performed using Tsingdao silica gel (60, particle size 300-400 mesh). The NMR spectra were recorded in CDCl<sub>3</sub> (calibrated at  $\delta = 7.26$  ppm for <sup>1</sup>H and  $\delta = 77.16$  ppm for <sup>13</sup>C) with tetramethylsilane (TMS) as an internal standard, at an ambient temperature on a Bruker Avance 600 operating at 600 MHz for <sup>1</sup>H NMR, and at 150 MHz for <sup>13</sup>C NMR. <sup>1</sup>H NMR was designated as follows: chemical shift (ppm), multiplicity (s = singlet, d = doublet, t = triplet, q = quartet, sep =

septet, dd = doublet of doublets, m = multiplet, br = broad), coupling constants (Hz), and integration.  $^{13}\text{C}$  NMR was designated as ppm. Optical rotations were measured using a 1 mL cell with a 1 dm path length on a Rudolph Autopol I polarimeter at 589 nm. HPLC analyses were performed using Daicel chiral columns on an Agilent 1260 Series HPLC instrument. GC analyses were carried out on Angilent 1200 Series instrument using assigned chiral capillary columns. Melting points were accessed on a SGWX-4A melting point apparatus, and only the data of suitable crystal products were given. High resolution mass spectra (HRMS) were obtained on Thermo Scientific Q Exactive hybrid quadrupole-Orbitrap mass spectrometer. PE refers to petroleum ether; EA refers to ethyl acetate; DCM refers to dichloromethane.

## 2. General Procedure A of Hydrogenation of $\gamma$ -Butenolides **1**

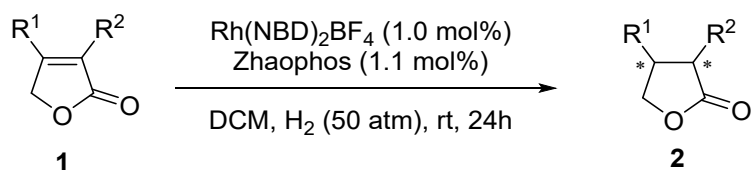

In the argon-filled glovebox, a solution of ZhaoPhos (9.7 mg, 11  $\mu\text{mol}$ ) and  $\text{Rh}(\text{NBD})_2\text{BF}_4$  (3.7 mg, 10  $\mu\text{mol}$ ) in 1.0 mL anhydrous DCM was stirred at room temperature for 40 min. A specified volume of the resulting solution (0.1 mL, 1.0 mol% Rh-Zhaophos catalyst) was transferred by syringe to a score-break ampule charged with substrate (0.1 mmol in 0.9 mL dichloromethane). The ampule was placed into an autoclave, which was then purged with  $\text{H}_2$  and charged with desired  $\text{H}_2$  pressure (50 atm). The reaction mixture was stirred at room temperature for 24 h. After release of  $\text{H}_2$  carefully, the reaction mixture was passed through a short column of silica gel (about 1.0 cm in height) in 1.0 mL syringe (equipped with Nylon-66 membrane syringe filter, pore size 0.22  $\mu\text{m}$ , diam. 13 mm) to remove the metal residue, and then rinsed with PE/EA (3:1, 1 mL). The combined filtrates were concentrated, and the obtained products were pure enough for NMR and HPLC analysis.

### 3. Additive Screening for Hydrogenation of $\gamma$ -Hydroxybutenolides **3a**

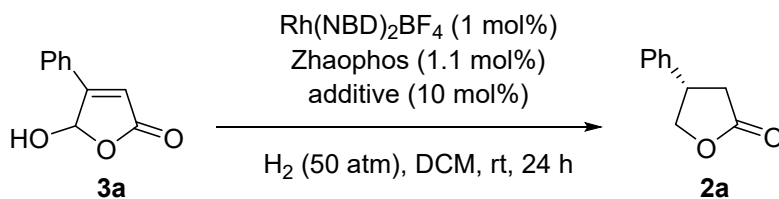

In the argon-filled glovebox, a solution of ZhaoPhos (9.7 mg, 11  $\mu$ mol) and Rh(NBD)<sub>2</sub>BF<sub>4</sub> (3.7 mg, 10  $\mu$ mol) in 1.0 mL anhydrous DCM was stirred at room temperature for 40 min. A specified volume of the resulting solution (0.1 mL, 1.0 mol% Rh-Zhaophos catalyst) was transferred by syringe to a score-break ampule charged with substrate **3a** (18 mg, 0.1 mmol in 0.9 mL dichloromethane), and then additive (0.01 mmol, 10 mol%) was added. The ampule was placed into an autoclave, which was then purged with H<sub>2</sub> and charged with desired H<sub>2</sub> pressure (50 atm). The reaction mixture was stirred at room temperature for 24 h. After release of H<sub>2</sub> carefully, the reaction mixture was directly analyzed by <sup>1</sup>H NMR and HPLC analysis.

| entry | additive                           | conv. (%) <sup>a</sup> | ee (%) <sup>b</sup> |
|-------|------------------------------------|------------------------|---------------------|
| 1     | -                                  | 91                     | 94                  |
| 2     | AcOH                               | 67                     | 94                  |
| 3     | H <sub>3</sub> PO <sub>4</sub>     | 100                    | 94                  |
| 4     | CF <sub>3</sub> COOH               | 100                    | 96                  |
| 5     | HCl                                | 85                     | 94                  |
| 6     | BF <sub>3</sub> ·Et <sub>2</sub> O | 93                     | 92                  |
| 7     | TMSOTf                             | 100                    | 90                  |
| 8     | AgOTf                              | 100                    | 92                  |

<sup>a</sup>Determined by <sup>1</sup>H NMR. <sup>b</sup>Determined by HPLC analysis.

#### 4. General Procedure B of Hydrogenation of $\gamma$ -Hydroxybutenolides **3**

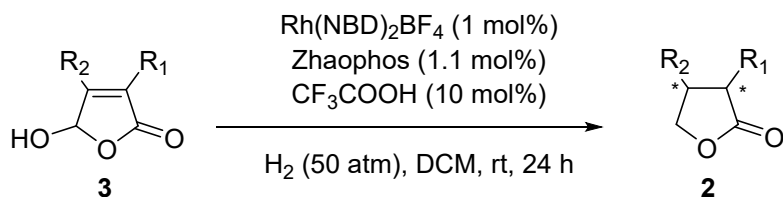

In the argon-filled glovebox, a solution of ZhaoPhos (9.7 mg, 11  $\mu\text{mol}$ ) and  $\text{Rh(NBD)}_2\text{BF}_4$  (3.7 mg, 10  $\mu\text{mol}$ ) in 1.0 mL anhydrous DCM was stirred at room temperature for 40 min. A specified volume of the resulting solution (0.1 mL, 1.0 mol% Rh-ZhaoPhos catalyst) was transferred by syringe to a score-break ampule charged with substrate **3** (0.1 mmol in 0.9 mL dichloromethane), and then  $\text{CF}_3\text{COOH}$  (1.2 mg, 10  $\mu\text{mol}$ , 10 mol%) was added. The ampule was placed into an autoclave, which was then purged with H<sub>2</sub> and charged with desired H<sub>2</sub> pressure (50 atm). The autoclave was stirred at room temperature for 24 h. After release of H<sub>2</sub> carefully, the reaction mixture was passed through a short column of silica gel (about 1.0 cm in height) in 1.0 ml syringe (equipped with Nylon-66 membrane syringe filter, pore size 0.22  $\mu\text{m}$ , diam. 13 mm) to remove the metal residue, and then rinsed with PE/EA (3:1, 1 mL). The combined filtrates were concentrated, and the obtained products were pure enough for NMR and HPLC analysis.

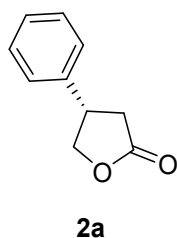

*(S)*-4-phenyldihydrofuran-2(3H)-one (**2a**): Compound **2a** was

obtained as a white solid (15.7 mg, 97% yield, 98% ee) according to general procedure A using **1a**; Compound **2a** was also obtained as a white solid (15.9 mg, 98% yield, 96% ee) according to general procedure B using **3a**.  $[\alpha]_D^{23} = +42.5$  ( $c$  0.84,  $\text{CHCl}_3$ ) for isomer with 98% ee; The spectral data were consistent with literature;<sup>6</sup>  $^1\text{H NMR}$  (600 MHz,  $\text{CDCl}_3$ )  $\delta$  [ppm] = 7.39 – 7.35 (m, 2H), 7.30 (dd,  $J = 7.2, 7.2$  Hz, 1H), 7.25 – 7.21 (m, 2H), 4.69 – 4.64 (m, 1H), 4.29 – 4.25 (m, 1H), 3.79 (p,  $J = 8.4$  Hz, 1H), 2.92 (dd,  $J = 17.5, 8.8$  Hz, 1H), 2.68 (dd,  $J = 17.5, 9.1$  Hz, 1H);  $^{13}\text{C NMR}$  (150 MHz,  $\text{CDCl}_3$ )  $\delta$  [ppm] = 176.5, 139.5, 129.2, 127.8, 126.8, 74.1, 41.2, 35.8; The enantiomeric excess was determined by HPLC analysis on Daicel Chiralpak AS-3 column (0.46 x 25 cm),  $n$ -hexane /  $i$ -propanol = 85:15, flow rate = 1.0 mL/min,  $\lambda = 210$  nm,  $t_R$ : 17.730 min ( $S$ ) (major), 19.896 min ( $R$ ) (minor).

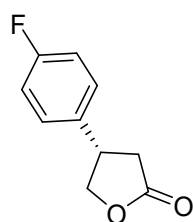

**2b**

*(S)*-4-(4-fluorophenyl)dihydrofuran-2(3H)-one (**2b**): Compound **2b** was obtained as a white solid (17.8 mg, 99% yield, 98% ee) according to general procedure A using **1b**; Compound **2b** was also obtained as a white solid (17.7 mg, 98% yield, 96% ee) according to general procedure B using **3b**.  $[\alpha]_D^{23} = +46.6$  ( $c$  0.57,  $\text{CHCl}_3$ ) for isomer with 98% ee; The spectral data were consistent with literature;<sup>6</sup>  $^1\text{H NMR}$  (600 MHz,  $\text{CDCl}_3$ )  $\delta$  [ppm]



= 7.23 – 7.17 (m, 2H), 7.06 – 7.00 (m, 2H), 4.66 – 4.61 (m, 1H), 4.24 – 4.18 (m, 1H), 3.77 (p,  $J = 8.7$  Hz, 1H), 2.90 (dd,  $J = 17.7, 8.7$  Hz, 1H), 2.61 (dd,  $J = 17.8, 9.0$  Hz, 1H);  $^{13}\text{C}$  NMR (150 MHz,  $\text{CDCl}_3$ )  $\delta$  [ppm] = 176.27, 162.1 (d,  $J_{\text{C-F}} = 244.8$  Hz), 135.3 (d,  $J_{\text{C-F}} = 3.2$  Hz), 128.4 (d,  $J_{\text{C-F}} = 7.7$  Hz), 116.0 (d,  $J_{\text{C-F}} = 21.5$  Hz), 74.0, 40.4, 35.8; The enantiomeric excess was determined by HPLC analysis on Daicel Chiralpak AS-3 column (0.46 x 25 cm), *n*-hexane / *i*-propanol = 80:20, flow rate = 1.0 mL/min,  $\lambda = 210$  nm,  $t_{\text{R}}$ : 16.737 min (*S*) (major), 17.838 min (*R*) (minor).

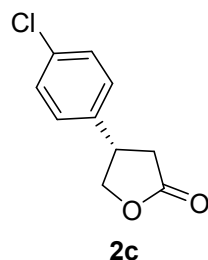

(*S*)-4-(4-chlorophenyl)dihydrofuran-2(3H)-one (**2c**): Compound **2c** was obtained as a white solid (19.1 mg, 97% yield, 98% ee) according to general procedure A using **1c**; Compound **2c** was also obtained as a white solid (19.1 mg, 97% yield, 94% ee) according to general procedure B using **3c**.  $[\alpha]_{\text{D}}^{23} = + 57.6$  ( $c$  0.75,  $\text{CHCl}_3$ ) for isomer with 98% ee; The spectral data were consistent with literature;<sup>6</sup>  $^1\text{H}$  NMR (600 MHz,  $\text{CDCl}_3$ )  $\delta$  [ppm] = 7.33 (d,  $J = 9.0$  Hz, 2H), 7.17 (d,  $J = 8.4$  Hz, 2H), 4.67 – 4.63 (m, 1H), 4.25 – 4.20 (m, 1H), 3.76 (p,  $J = 8.3$  Hz, 1H), 2.92 (dd,  $J = 17.5, 8.8$  Hz, 1H), 2.62 (dd,  $J = 17.5, 8.9$  Hz, 1H);  $^{13}\text{C}$  NMR (150 MHz,  $\text{CDCl}_3$ )  $\delta$  [ppm] = 176.1, 138.1, 133.7, 129.4, 128.2, 73.9, 40.6, 35.7; The enantiomeric excess was determined by HPLC analysis on Daicel Chiralpak IB N-3

column (0.46 x 25 cm), *n*-hexane / *i*-propanol = 85:15, flow rate = 1.0 mL/min,  $\lambda$  = 220 nm,  $t_R$ : 16.840 min (*S*) (major), 17.754 min (*R*) (minor).

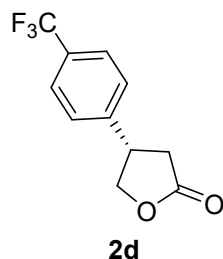

*(S)*-4-(4-(trifluoromethyl)phenyl)dihydrofuran-2(3H)-one      (**2d**):

Compound **2d** was obtained as a white solid (21.9 mg, 95% yield, 97% ee) according to general procedure A using **1d**; Compound **2d** was also obtained as a white solid (22.6 mg, 98% yield, 98% ee) according to general procedure B using **3d**.  $[\alpha]_D^{23} = + 62.0$  (*c* 0.58, CHCl<sub>3</sub>) for isomer with 97% ee; The spectral data were consistent with literature;<sup>7</sup> <sup>1</sup>H NMR (600 MHz, CDCl<sub>3</sub>)  $\delta$  [ppm] = 7.63 (d, *J* = 8.0 Hz, 2H), 7.37 (d, *J* = 8.0 Hz, 2H), 4.72 – 4.66 (m, 1H), 4.31 – 4.25 (m, 1H), 3.86 (p, *J* = 8.2 Hz, 1H), 2.97 (dd, *J* = 17.5, 8.8 Hz, 1H), 2.67 (dd, *J* = 17.5, 8.5 Hz, 1H); <sup>13</sup>C NMR (150 MHz, CDCl<sub>3</sub>)  $\delta$  [ppm] = 175.9, 143.8, 130.2 (q, *J*<sub>C-CF<sub>3</sub></sub> = 32.6 Hz), 127.3, 124.0 (q, *J*<sub>C-CF<sub>3</sub></sub> = 270.8 Hz), 126.2 (q, *J*<sub>C-CF<sub>3</sub></sub> = 3.5 Hz), 73.6, 41.0, 35.6; The enantiomeric excess was determined by HPLC analysis on Daicel Chiralpak IF-3 column (0.46 x 25 cm), *n*-hexane / *i*-propanol = 90:10, flow rate = 1.0 mL/min,  $\lambda$  = 210 nm,  $t_R$ : 12.683 min (*R*) (minor), 13.506 min (*S*) (major).

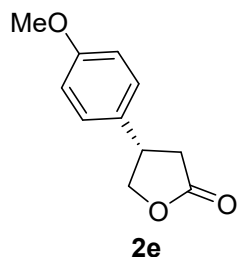

*(S)*-4-(4-methoxyphenyl)dihydrofuran-2(3H)-one (**2e**): a white solid, 18.3 mg, 95% yield, 98% ee,  $[\alpha]_D^{23} = +42.9$  (*c* 0.57, CHCl<sub>3</sub>); The spectral data were consistent with literature;<sup>7</sup> <sup>1</sup>H NMR (400 MHz, CDCl<sub>3</sub>)  $\delta$  [ppm] = 7.17 – 7.11 (m, 2H), 6.91 – 6.86 (m, 2H), 4.65 – 4.58 (m, 1H), 4.24 – 4.16 (m, 1H), 3.79 (s, 3H), 3.72 (p, *J* = 8.1 Hz, 1H), 2.92 – 2.83 (m, 1H), 2.66 – 2.56 (m, 1H); <sup>13</sup>C NMR (150 MHz, CDCl<sub>3</sub>)  $\delta$  [ppm] = 176.6, 159.0, 131.3, 127.8, 114.4, 74.2, 55.3, 40.4, 35.8; The enantiomeric excess was determined by HPLC analysis on Daicel Chiralpak IB N-3 column (0.46 x 25 cm), *n*-hexane / *i*-propanol = 85:15, flow rate = 1.0 mL/min,  $\lambda = 230$  nm,  $t_R$ : 16.449 min (*S*) (major), 17.499 min (*R*) (minor).

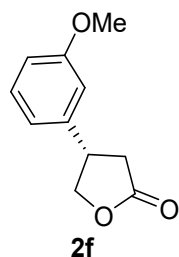

*(S)*-4-(3-methoxyphenyl)dihydrofuran-2(3H)-one (**2f**): Compound **2f** was obtained as a white solid (18.5 mg, 96% yield, 98% ee) according to general procedure A using **1f**; Compound **2f** was also obtained as a white solid (18.6 mg, 97% yield, 95% ee) according to general procedure B using **3f**.  $[\alpha]_D^{23} = +45.0$  (*c* 1.0, CHCl<sub>3</sub>) for isomer with 98% ee; The spectral data

were consistent with literature;<sup>8</sup> <sup>1</sup>H NMR (600 MHz, CDCl<sub>3</sub>) δ [ppm] = 7.30 – 7.26 (m, 1H), 6.85 – 6.80 (m, 2H), 6.76 – 6.74 (m, 1H), 4.67 – 4.62 (m, 1H), 4.28 – 4.23 (m, 1H), 3.80 (s, 3H), 3.75 (p, J = 8.4 Hz, 1H), 2.90 (dd, J = 17.5, 8.7 Hz, 1H), 2.66 (dd, J = 17.5, 9.1 Hz, 1H); <sup>13</sup>C NMR (150 MHz, CDCl<sub>3</sub>) δ [ppm] = 176.5, 160.2, 141.1, 130.3, 118.9, 113.0, 112.7, 74.0, 55.4, 41.2, 35.7; The enantiomeric excess was determined by HPLC analysis on Daicel Chiralpak AS-3 column (0.46 x 25 cm), the gradient elution was *n*-hexane / *i*-propanol as 95:5~50:50 for 0-20min, 50:50 for 20-25min, 95:5 for 25-30min, flow rate = 1.0 mL/min, λ = 220 nm, t<sub>R</sub>: 18.456 min (*S*) (major), 19.425 min (*R*) (minor).

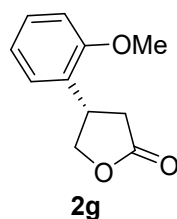

(*S*)-4-(2-methoxyphenyl)dihydrofuran-2(3H)-one (**2g**): Compound **2g** was obtained as a white solid (18.6 mg, 97% yield, 97% ee) according to general procedure A using **1g**; Compound **2g** was also obtained as a white solid (18.8 mg, 98% yield, 96% ee) according to general procedure B using **3g**. [α]<sub>D</sub><sup>23</sup> = + 42.7 (*c* 0.93, CHCl<sub>3</sub>) for isomer with 97% ee; The spectral data were consistent with literature;<sup>9</sup> <sup>1</sup>H NMR (600 MHz, CDCl<sub>3</sub>) δ [ppm] = 7.31 – 7.25 (m, 1H), 7.14 (d, J = 7.5 Hz, 1H), 6.97 – 6.88 (m, 2H), 4.68 – 4.63 (m, 1H), 4.30 – 4.26 (m, 1H), 3.96 (p, J = 8.3 Hz, 1H), 3.84 (s, 3H), 2.83 (dd, J = 17.5, 9.2 Hz, 1H), 2.77 (dd, J = 17.5, 8.4 Hz, 1H); <sup>13</sup>C NMR

(150 MHz, CDCl<sub>3</sub>)  $\delta$  [ppm] = 177.2, 157.2, 128.7, 127.6, 120.7, 110.7, 72.9, 55.2, 36.6, 33.8; The enantiomeric excess was determined by HPLC analysis on Daicel Chiralpak AS-3 column (0.46 x 25 cm), the gradient elution was *n*-hexane / *i*-propanol as 95:5~50:50 for 0-20min, 50:50 for 20-25min, 95:5 for 25-30min, flow rate = 1.0 mL/min,  $\lambda$  = 220 nm,  $t_R$ : 14.748 min (*S*) (major), 17.428 min (*R*) (minor).

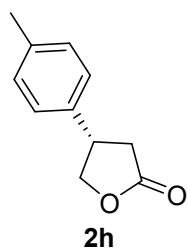

(*S*)-4-(*p*-tolyl)dihydrofuran-2(3*H*)-one (**2h**): Compound **2h** was obtained as a white solid (16.9 mg, 96% yield, 98% ee) according to general procedure A using **1h**; Compound **2h** was also obtained as a white solid (16.7 mg, 95% yield, 91% ee) according to general procedure B using **3h**.  $[\alpha]_D^{23} = +39.4$  (*c* 0.58, CHCl<sub>3</sub>) for isomer with 98% ee; The spectral data were consistent with literature;<sup>6</sup> <sup>1</sup>H NMR (600 MHz, CDCl<sub>3</sub>)  $\delta$  [ppm] = 7.18 (d, *J* = 8.0 Hz, 2H), 7.12 (d, *J* = 7.7 Hz, 2H), 4.67 – 4.62 (m, 1H), 4.26 – 4.21 (m, 1H), 3.75 (p, *J* = 8.7 Hz, 1H), 2.93 – 2.87 (m, 1H), 2.69 – 2.62 (m, 1H), 2.34 (s, 3H); <sup>13</sup>C NMR (150 MHz, CDCl<sub>3</sub>)  $\delta$  [ppm] = 176.7, 137.6, 136.4, 129.9, 126.7, 74.3, 40.9, 35.9, 21.1; The enantiomeric excess was determined by HPLC analysis on Daicel Chiralpak IB N-3 column (0.46 x 25 cm), *n*-hexane / *i*-propanol = 90:10, flow rate = 1.0 mL/min,  $\lambda$  = 220 nm,  $t_R$ : 15.021 min (*S*) (major), 15.915 min (*R*) (minor).

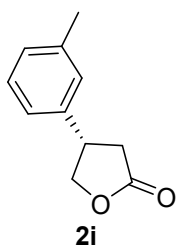

*(S)*-4-(*m*-tolyl)dihydrofuran-2(3*H*)-one (**2i**): Compound **2i** was obtained as a white solid (16.9 mg, 96% yield, 98% ee) according to general procedure A using **1i**; Compound **2i** was also obtained as a white solid (17.1 mg, 97% yield, 94% ee) according to general procedure B using **3i**.  $[\alpha]_D^{23} = +38.2$  (*c* 0.60, CHCl<sub>3</sub>) for isomer with 98% ee; The spectral data were consistent with literature;<sup>10</sup> <sup>1</sup>H NMR (600 MHz, CDCl<sub>3</sub>)  $\delta$  [ppm] = 7.27 – 7.24 (m, 1H), 7.11 (d, *J* = 7.5 Hz, 1H), 7.06 – 7.00 (m, 2H), 4.67 – 4.63 (m, 1H), 4.28 – 4.24 (m, 1H), 3.75 (p, *J* = 8.4 Hz, 1H), 2.90 (dd, *J* = 17.5, 8.7 Hz, 1H), 2.67 (dd, *J* = 17.5, 9.1 Hz, 1H), 2.36 (s, 3H); <sup>13</sup>C NMR (150 MHz, CDCl<sub>3</sub>)  $\delta$  [ppm] = 176.6, 139.5, 139.0, 129.1, 128.5, 127.5, 123.8, 74.2, 41.1, 35.8, 21.5; The enantiomeric excess was determined by HPLC analysis on Daicel Chiralpak AS-3 column (0.46 x 25 cm), *n*-hexane / *i*-propanol = 90:10, flow rate = 1.0 mL/min,  $\lambda$  = 210 nm, *t*<sub>R</sub>: 16.363 min (*S*) (major), 19.173 min (*R*) (minor).

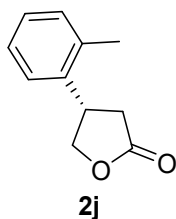

*(S)*-4-(*o*-tolyl)dihydrofuran-2(3*H*)-one (**2j**): Compound **2j** was obtained as a white solid (16.9 mg, 96% yield, 98% ee) according to

general procedure A using **1j**; Compound **2j** was also obtained as a white solid (17.4 mg, 99% yield, 99% ee) according to general procedure B using **3j**.  $[\alpha]_{\text{D}}^{23} = + 40.8$  ( $c$  0.45,  $\text{CHCl}_3$ ) for isomer with 98% ee; The spectral data were consistent with literature;<sup>7</sup>  $^1\text{H}$  NMR (600 MHz,  $\text{CDCl}_3$ )  $\delta$  [ppm] = 7.25 – 7.22 (m, 2H), 7.21 – 7.18 (m, 2H), 4.67 – 4.63 (m, 1H), 4.32 – 4.28 (m, 1H), 3.99 (p,  $J = 7.8$  Hz, 1H), 2.91 (dd,  $J = 17.5, 8.7$  Hz, 1H), 2.65 (dd,  $J = 17.5, 8.1$  Hz, 1H), 2.35 (s, 3H);  $^{13}\text{C}$  NMR (150 MHz,  $\text{CDCl}_3$ )  $\delta$  [ppm] = 176.6, 137.7, 135.9, 131.1, 127.6, 127.0, 125.0, 73.5, 37.2, 35.4, 19.8; The enantiomeric excess was determined by HPLC analysis on Daicel Chiralpak IC column (0.46 x 25 cm), *n*-hexane / *i*-propanol = 80:20, flow rate = 1.0 mL/min,  $\lambda = 210$  nm,  $t_{\text{R}}$ : 17.024 min (*R*) (minor), 19.168 min (*S*) (major).

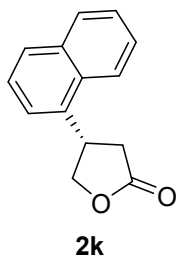

(*S*)-4-(naphthalen-1-yl)dihydrofuran-2(3H)-one (**2k**): Compound **2k** was obtained as a white solid (20.2 mg, 95% yield, 98% ee) according to general procedure A using **1k**; Compound **2k** was also obtained as a white solid (21.0 mg, 99% yield, 99% ee) according to general procedure B using **3k**.  $[\alpha]_{\text{D}}^{23} = + 56.1$  ( $c$  0.89,  $\text{CHCl}_3$ ) for isomer with 98% ee; The spectral data were consistent with literature;<sup>6</sup>  $^1\text{H}$  NMR (600 MHz,  $\text{CDCl}_3$ )  $\delta$  [ppm] = 7.96 (d,  $J = 8.4$  Hz, 1H), 7.91 (d,  $J = 7.8$  Hz, 1H), 7.82 (d,  $J = 8.1$  Hz,

1H), 7.60 – 7.56 (m, 1H), 7.56 – 7.53 (m, 1H), 7.50 – 7.46 (m, 1H), 7.43 (d, J = 7.1 Hz, 1H), 4.83 (dd, J = 9.2, 7.3 Hz, 1H), 4.57 (p, J = 7.3 Hz, 1H), 4.46 (dd, J = 9.2, 6.3 Hz, 1H), 3.08 (dd, J = 17.4, 8.5 Hz, 1H), 2.86 (dd, J = 17.4, 7.3 Hz, 1H); <sup>13</sup>C NMR (150 MHz, CDCl<sub>3</sub>) δ [ppm] = 176.5, 135.2, 134.2, 131.3, 129.5, 128.5, 126.9, 126.2, 125.7, 122.6, 122.5, 73.5, 36.9, 35.3; The enantiomeric excess was determined by HPLC analysis on Daicel Chiralpak IB N-3 column (0.46 x 25 cm), *n*-hexane / *i*-propanol = 70:30, flow rate = 1.0 mL/min, λ = 220 nm, t<sub>R</sub>: 17.423 min (*S*) (major), 19.427 min (*R*) (minor).

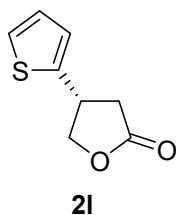

(*R*)-4-(thiophen-2-yl)dihydrofuran-2(3H)-one (**21**): a white solid, 16.7 mg, 99% yield, 98% ee, [α]<sub>D</sub><sup>23</sup> = + 43.2 (*c* 0.73, CHCl<sub>3</sub>); The spectral data were consistent with literature;<sup>11</sup> <sup>1</sup>H NMR (600 MHz, CDCl<sub>3</sub>) δ [ppm] = 7.24 (dd, J = 5.1, 1.2 Hz, 1H), 6.98 (dd, J = 5.1, 3.5 Hz, 1H), 6.92 (dt, J = 3.5, 1.0 Hz, 1H), 4.65 (dd, J = 9.0, 7.6 Hz, 1H), 4.27 (dd, J = 9.1, 7.8 Hz, 1H), 4.05 (p, J = 8.3 Hz, 1H), 2.96 (dd, J = 17.4, 8.5 Hz, 1H), 2.70 (dd, J = 17.3, 9.1 Hz, 1H); <sup>13</sup>C NMR (150 MHz, CDCl<sub>3</sub>) δ [ppm] = 175.7, 142.3, 127.4, 124.64, 124.60, 74.2, 37.0, 36.8; The enantiomeric excess was determined by HPLC analysis on Daicel Chiralpak AD-3 column (0.46 x



25 cm), *n*-hexane / *i*-propanol = 95:5, flow rate = 1.0 mL/min,  $\lambda = 230$  nm,  $t_R$ : 13.919 min (*S*) (minor), 15.073 min (*R*) (major).

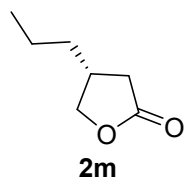

*(R)*-4-propyldihydrofuran-2(3*H*)-one (**2m**): Compound **2m** was obtained as a colorless liquid (12.4 mg, 97% yield, 95% ee) according to general procedure A using **1m**; Compound **2m** was also obtained as a colorless liquid (12.4 mg, 97% yield, 96% ee) according to general procedure B using **3m**.  $[\alpha]_D^{23} = +7.9$  (*c* 1.5, CHCl<sub>3</sub>) for isomer with 95% ee; The spectral data were consistent with literature;<sup>12</sup> <sup>1</sup>H NMR (600 MHz, CDCl<sub>3</sub>)  $\delta$  [ppm] = 4.40 (dd, *J* = 8.9, 7.3 Hz, 1H), 3.91 (dd, *J* = 9.0, 7.2 Hz, 1H), 2.64 – 2.51 (m, 2H), 2.16 (dd, *J* = 16.8, 7.8 Hz, 1H), 1.47 – 1.42 (m, 2H), 1.38 – 1.30 (m, 2H), 0.93 (t, *J* = 7.3 Hz, 3H); <sup>13</sup>C NMR (150 MHz, CDCl<sub>3</sub>)  $\delta$  [ppm] = 177.4, 73.5, 35.6, 35.4, 34.6, 20.7, 14.0; The enantiomeric excess was determined by GC analysis on  $\gamma$ -DEX™ 225 L  $\times$  I.D. 30 m  $\times$  0.25 mm,  $d_f$  0.25  $\mu$ m, oven program (120 °C for 2 min, then 1 °C/min to 127 °C for 22 min, then 20 °C/min to 200 °C for 3 min), detector FID 250 °C,  $t_R$ : 20.282 min (*S*) (minor), 20.501 min (*R*) (major).

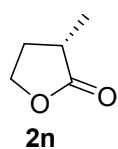

*(S)*-3-methyldihydrofuran-2(3*H*)-one (**2n**): Compound **2n** was obtained as a colorless liquid (9.8 mg, 98% yield, 84% ee) according to

general procedure A using **1n**; Compound **2n** was also obtained as a colorless liquid (9.8 mg, 98% yield, 82% ee) according to general procedure A using **1n'**;  $[\alpha]_{\text{D}}^{23} = -16.4$  ( $c$  0.58,  $\text{CHCl}_3$ ) for isomer with 84% ee; The spectral data were consistent with literature;<sup>13</sup>  $^1\text{H}$  NMR (600 MHz,  $\text{CDCl}_3$ )  $\delta$  [ppm] = 4.29 (td,  $J = 8.7, 2.7$  Hz, 1H), 4.14 (td,  $J = 9.4, 6.6$  Hz, 1H), 2.60 – 2.52 (m, 1H), 2.44 – 2.36 (m, 1H), 1.92 – 1.84 (m, 1H), 1.23 (d,  $J = 7.3$  Hz, 3H);  $^{13}\text{C}$  NMR (150 MHz,  $\text{CDCl}_3$ )  $\delta$  [ppm] = 180.2, 66.3, 34.2, 30.7, 15.2; The enantiomeric excess was determined by GC analysis on  $\beta$ -DEX™ 225 L  $\times$  I.D. 30 m  $\times$  0.25 mm,  $d_f$  0.25  $\mu\text{m}$ , oven program (105  $^\circ\text{C}$  for 0 min, then 1  $^\circ\text{C}/\text{min}$  to 113  $^\circ\text{C}$  for 18 min, then 20  $^\circ\text{C}/\text{min}$  to 200  $^\circ\text{C}$  for 4 min), detector FID 250  $^\circ\text{C}$ ,  $t_{\text{R}}$ : 13.663 min (*R*) (minor), 13.845 min (*S*) (major).

## 5. Synthetic Applications

### Gram-scale hydrogenation of **3m** (S/C = 5000) and application in brivaracetam synthesis

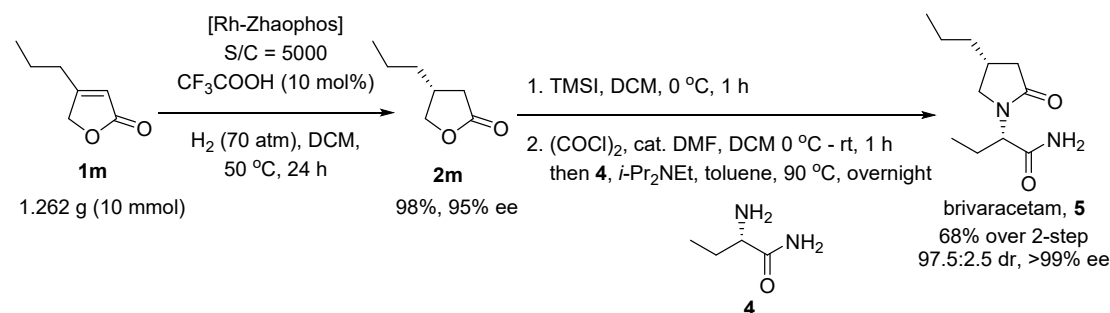

In the argon-filled glovebox, a solution of ZhaoPhos (9.7 mg, 11  $\mu$ mol) and Rh(NBD)<sub>2</sub>BF<sub>4</sub> (3.7 mg, 10  $\mu$ mol) in 1.0 mL anhydrous DCM was stirred at room temperature for 40 min. A specified volume of the resulting solution (0.2 mL, 0.02 mol% Rh-Zhaophos catalyst) was transferred by syringe to a score-break ampule charged with substrate **1m** (10 mmol in 10 mL dichloromethane), and then CF<sub>3</sub>COOH (0.11 g, 1.0 mmol, 10 mol%) was added. The ampule was placed into an autoclave, which was then purged with H<sub>2</sub> and charged with desired H<sub>2</sub> pressure (50 atm). The autoclave was stirred at room temperature for 24 h. After release of H<sub>2</sub> carefully, the reaction mixture was passed through a short column of silica gel (about 1.0 cm in height) in 10 ml syringe (equipped with Nylon-66 membrane syringe filter, pore size 0.22  $\mu$ m, diam. 13 mm) to remove the metal residue, and then rinsed with PE/EA (3:1, 1 mL). The combined filtrates were concentrated, and the obtained products **2m** (1.3 g) were pure enough for the next step.

To a 50 mL round-bottomed flask containing  $\alpha,\beta$ -unsaturated lactone **2m** (0.77 g, 6.0 mmol, 1.0 equiv.) under ambient atmosphere was added dry DCM (20 mL) at room temperature. The mixture was cooled down to 0 °C, and TMSI (1.3 mL, 9.0 mmol, 1.5 equiv.) was added. After the reaction was stirred at 0 °C for 1 h, 1 M HCl (30 mL) was added at 0 °C, and then the layers were separated. The aqueous layer was extracted with DCM (3  $\times$  20 mL). The combined organic layers were washed with water (30 mL) and brine (30 mL), dried over anhydrous MgSO<sub>4</sub>, and concentrated. The crude product (1.7 g) was directly used in the next step without further purification. The crude acid was then dissolved in dry DCM (30 mL) with two drops of DMF and cooled to 0 °C. Oxalyl chloride (0.78 mL, 9.0 mmol, 1.5 equiv.) was added slowly via syringe over 5 min. The reaction was allowed to warm to room temperature, and then stirred for 5 hours. The reaction mixture was concentrated to afford the crude acid chloride (1.6 g) which was used in the next step without further purification. The crude acid chloride was dissolved in dry toluene (20 mL), and (*S*)-2-aminobutyramide (0.67 g, 6.6 mmol, 1.1 equiv.) and *i*-Pr<sub>2</sub>NEt (1.6 g, 12 mmol, 2.0 equiv.) were added at room temperature. The reaction mixture was heated to 90 °C, and stirred for overnight at the same temperature. After cooling to 0 °C, water was added, and then the layers were separated. The aqueous layer was extracted with DCM (3  $\times$  20 mL). The combined organic layers were washed with water (30 mL) and brine

(30 mL), dried over anhydrous  $\text{MgSO}_4$ , and concentrated. The residue was purified by flash chromatography on silica gel eluting with DCM/MeOH (10:1) to give brivaracetam **5** as a white solid (0.87 g, 68% yield over 3 steps, 96.9:3.1 dr, >99% ee). The spectroscopic data were identical to previous literature reports.<sup>14</sup>  $[\alpha]_{\text{D}}^{23} = -57.8$  ( $c$  1.0,  $\text{CHCl}_3$ );  $^1\text{H}$  NMR (600 MHz,  $\text{CDCl}_3$ )  $\delta$  [ppm] = 6.31 (s, 1H), 5.56 (s, 1H), 4.44 (dd,  $J = 8.8, 6.8$  Hz, 1H), 3.48 (dd,  $J = 9.8, 7.9$  Hz, 1H), 3.02 (dd,  $J = 9.8, 7.1$  Hz, 1H), 2.57 (dd,  $J = 16.8, 8.7$  Hz, 1H), 2.32 (hept,  $J = 7.7$  Hz, 1H), 2.07 (dd,  $J = 16.8, 8.0$  Hz, 1H), 1.93 (dp,  $J = 14.4, 7.3$  Hz, 1H), 1.68 (dp,  $J = 14.9, 7.5$  Hz, 1H), 1.40 (q,  $J = 7.4$  Hz, 2H), 1.36 – 1.27 (m, 2H), 0.90 (q,  $J = 7.1$  Hz, 6H);  $^{13}\text{C}$  NMR (150 MHz,  $\text{CDCl}_3$ )  $\delta$  175.8, 172.2, 56.1, 49.7, 38.0, 36.7, 32.0, 21.0, 20.7, 14.1, 10.6; The enantiomeric excess and diastereomeric excess was determined by HPLC on Chiralcel IC-3 column (0.46 x 25 cm), *n*-hexane / *i*-propanol = 45:55, flow rate = 1.0 mL/min,  $\lambda = 210$  nm,  $t_{\text{R}}$ : 10.619 min (2*S*, 4*R*) (major), 15.755 min (2*S*, 4*S*) (minor).

### Synthesis of arctigenin analogue

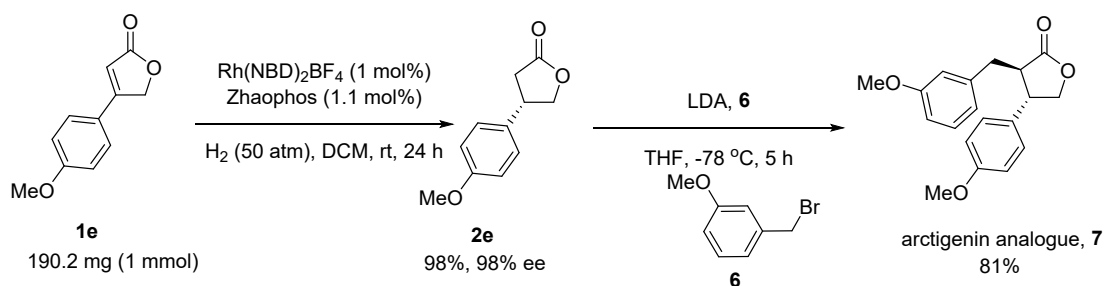

In the argon-filled glovebox, a solution of ZhaoPhos (9.7 mg, 0.011 mmol) and  $\text{Rh}(\text{NBD})_2\text{BF}_4$  (3.7 mg, 0.010 mmol) in 1.0 mL anhydrous

DCM was stirred at room temperature for 40 min, and the resulting solution was then transferred by syringe to a score-break ampule charged with substrate (1.0 mmol in 4.0 mL dichloromethane). The ampule was placed into an autoclave, which was then purged with H<sub>2</sub> and charged with desired H<sub>2</sub> pressure (50 atm). The autoclave was stirred at room temperature for 24 h. After release of H<sub>2</sub> carefully, the reaction mixture was passed through a short column of silica gel (about 1.0 cm in height) in 10 ml syringe (equipped with Nylon-66 membrane syringe filter, pore size 0.22 μm, diam. 13 mm) to remove the metal residue, and then rinsed with PE/EA (3:1, 1 mL). The combined filtrates were concentrated, and the obtained products **2e** (189 mg, 98% ee) were pure enough for the next step.

To a 10 mL round-bottomed flask containing lactone **2e** (96 mg, 0.5 mmol, 1.0 equiv.) under argon atmosphere was added dry THF (2 mL) at room temperature. The mixture was cooled down to -78 °C, and LDA (0.3 mL, 0.6 mmol, 2.0 mol/L in THF, 1.2 equiv.) was added dropwise. After the reaction was stirred at same temperature for 30 min, 1-(bromomethyl)-3-methoxybenzene **6** (0.12 g, 0.6 mmol, 1.2 equiv.) in THF (1 mL) was added dropwise, and the resulting solution was further stirred for 5 h at -78 °C. Water (4 mL) was added, and the mixture was allowed to warm up to room temperature. DCM (4 mL) was added, and then the layers were separated. The aqueous layer was extracted with DCM (3 × 4 mL). The combined organic layers were washed with water (10 mL) and brine (10

mL), dried over anhydrous  $\text{MgSO}_4$ , and concentrated. The residue was purified by flash chromatography on silica gel eluting with PE/EA (4:1) to obtain **7** as a colorless oil (0.12 g, 81% yield). The spectroscopic data were identical to previous literature reports.<sup>8</sup>  $[\alpha]_{\text{D}}^{23} = + 4.7$  (*c* 0.5,  $\text{CHCl}_3$ );  $^1\text{H}$  NMR (600 MHz,  $\text{CDCl}_3$ )  $\delta$  [ppm] = 7.15 (t,  $J = 7.8$  Hz, 1H), 7.08 (d,  $J = 8.6$  Hz, 2H), 6.86 (d,  $J = 8.6$  Hz, 2H), 6.75 – 6.71 (m, 2H), 6.69 (s, 1H), 4.38 (t,  $J = 8.6$  Hz, 1H), 4.04 (t,  $J = 9.5$  Hz, 1H), 3.80 (s, 3H), 3.74 (s, 3H), 3.31 (q,  $J = 10.1$  Hz, 1H), 3.12 (dd,  $J = 14.0, 5.1$  Hz, 1H), 3.02 (dt,  $J = 10.9, 5.4$  Hz, 1H), 2.93 (dd,  $J = 14.0, 5.6$  Hz, 1H);  $^{13}\text{C}$  NMR (151 MHz,  $\text{CDCl}_3$ )  $\delta$  [ppm] = 177.8, 159.8, 159.2, 138.9, 129., 128.5, 127.9, 122.2, 115.2, 114.6, 112.6, 72.6, 55.4, 55.2, 48.0, 45.0, 33.7.

## 6. NMR Spectra

$^1\text{H}$  NMR (600 MHz,  $\text{CDCl}_3$ )

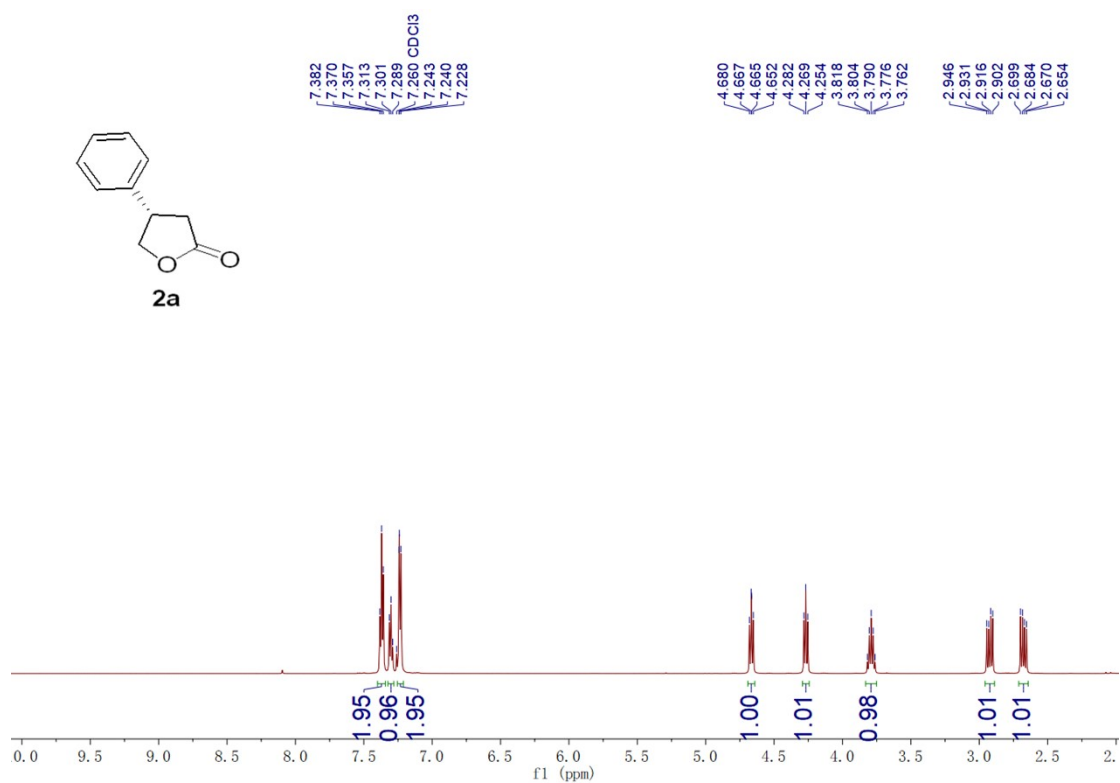

$^{13}\text{C}$  NMR (150 MHz,  $\text{CDCl}_3$ )

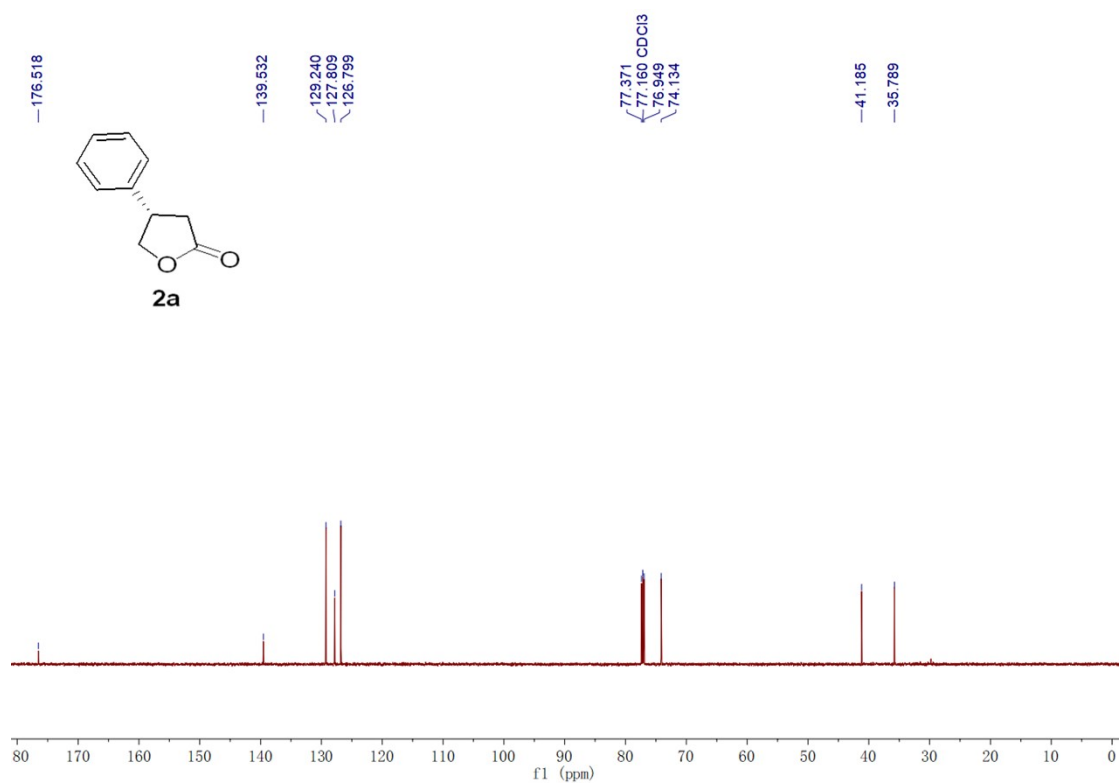



$^1\text{H}$  NMR (600 MHz,  $\text{CDCl}_3$ )

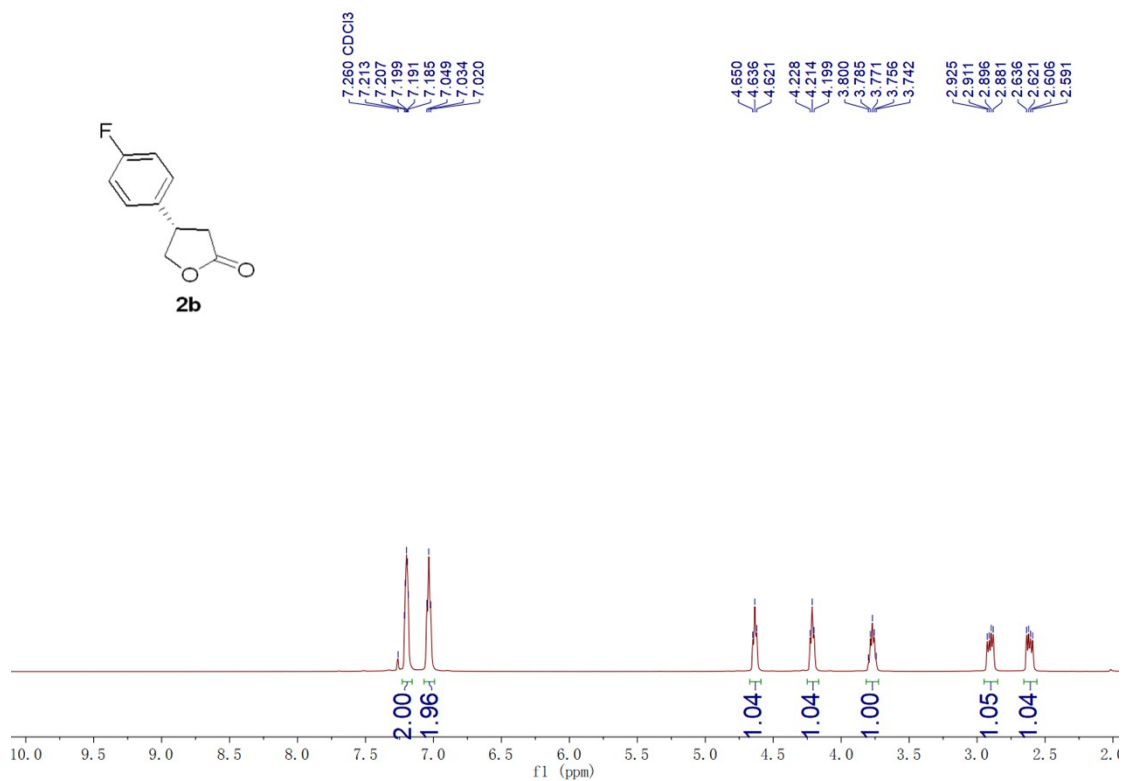

$^{13}\text{C}$  NMR (150 MHz,  $\text{CDCl}_3$ )

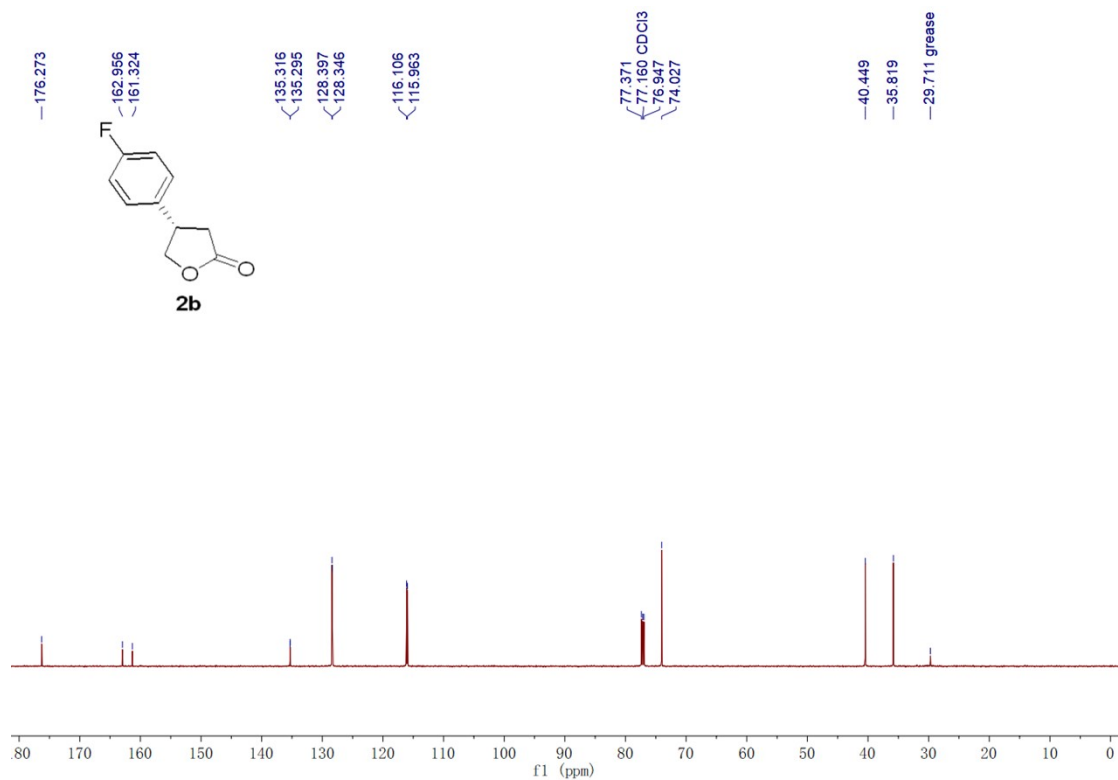

$^1\text{H}$  NMR (600 MHz,  $\text{CDCl}_3$ )

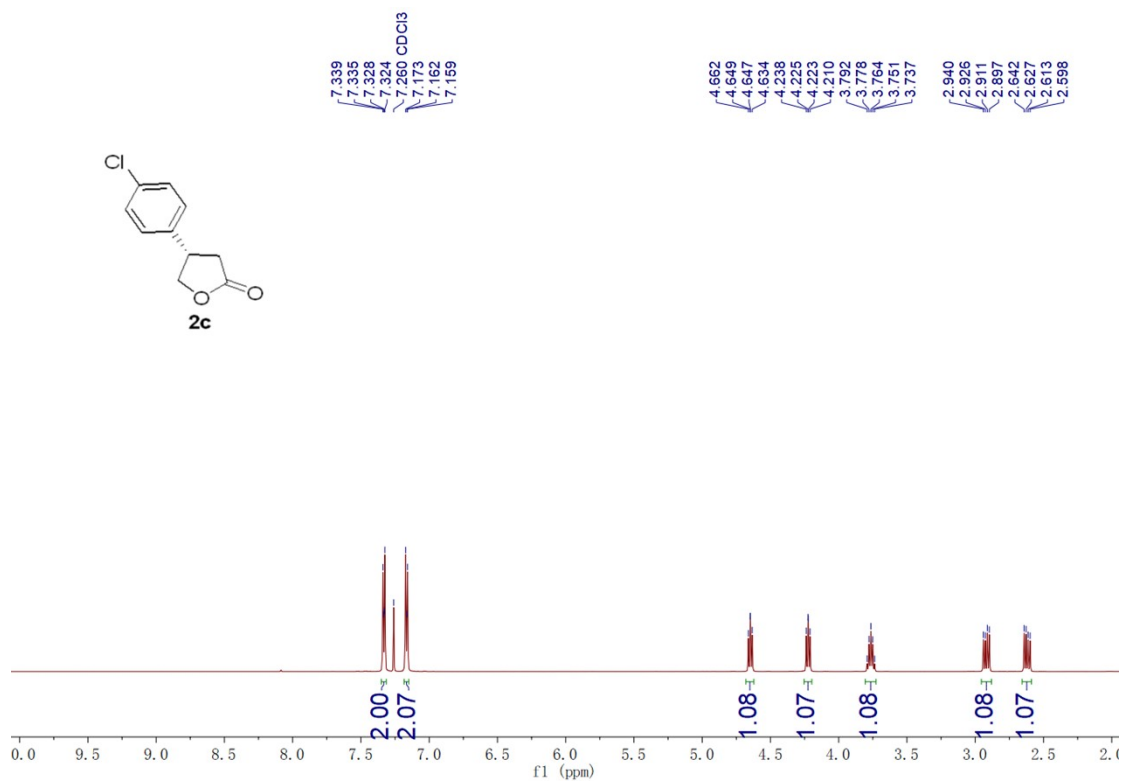

$^{13}\text{C}$  NMR (150 MHz,  $\text{CDCl}_3$ )

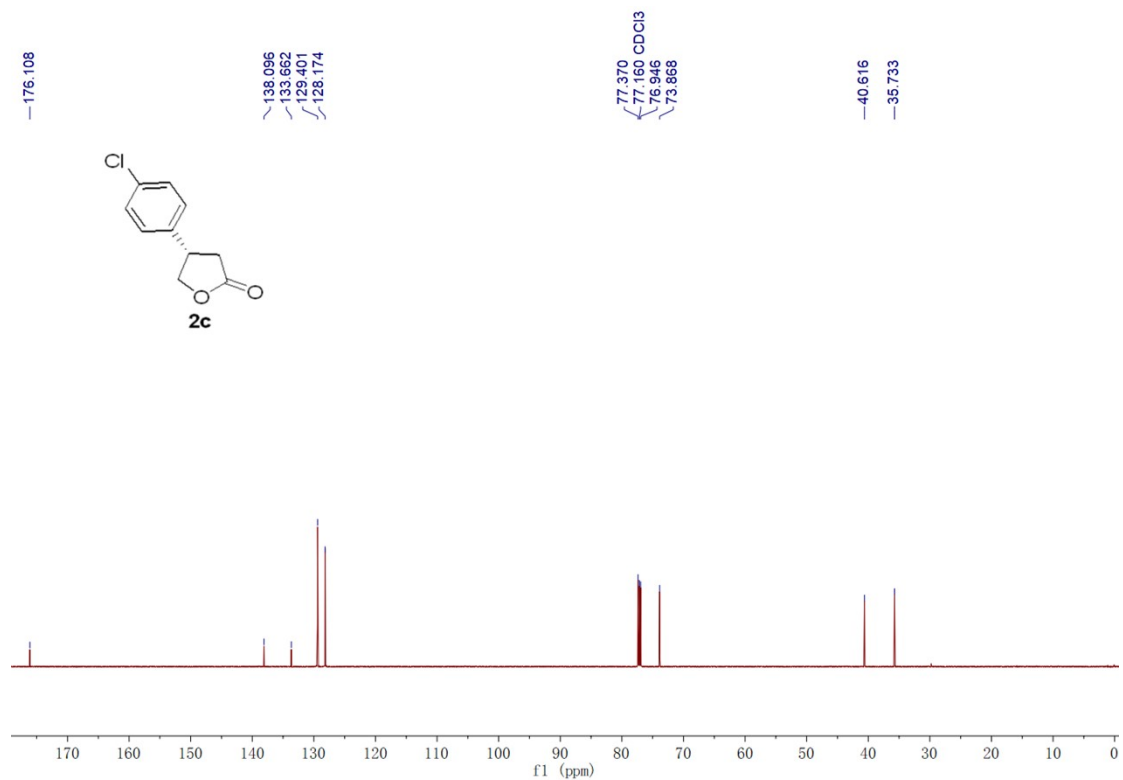

# $^1\text{H}$ NMR (600 MHz, $\text{CDCl}_3$ )

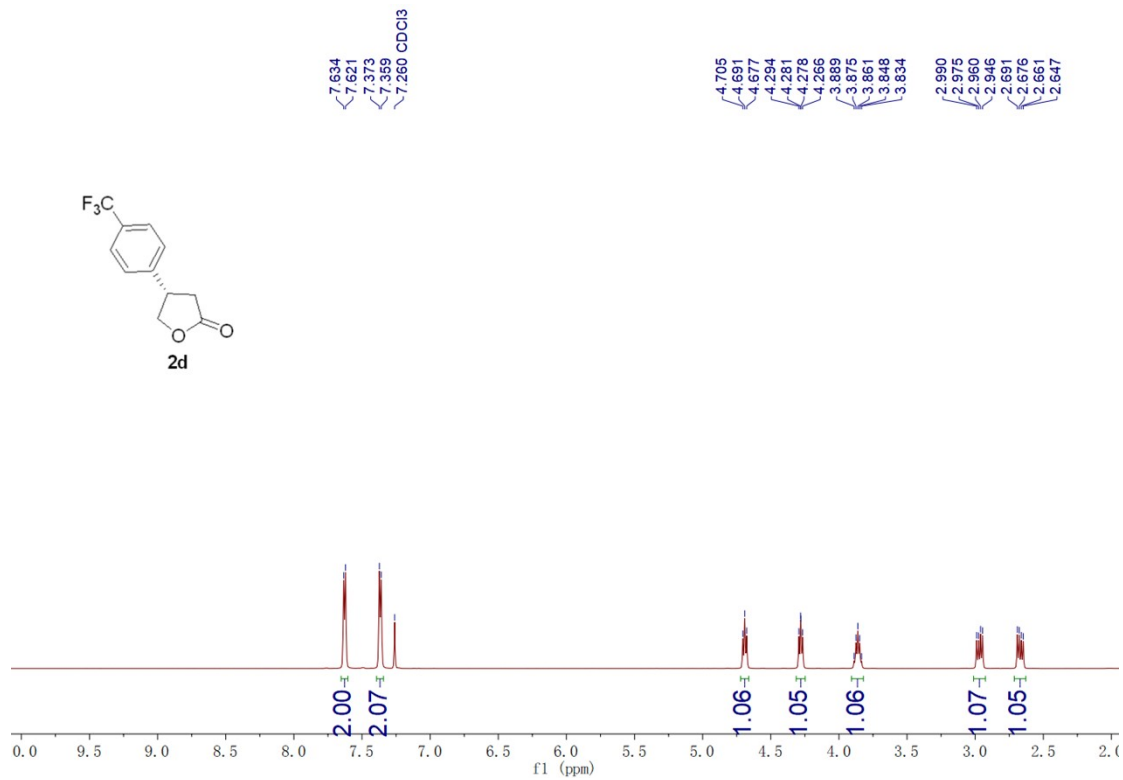

# $^{13}\text{C}$ NMR (150 MHz, $\text{CDCl}_3$ )

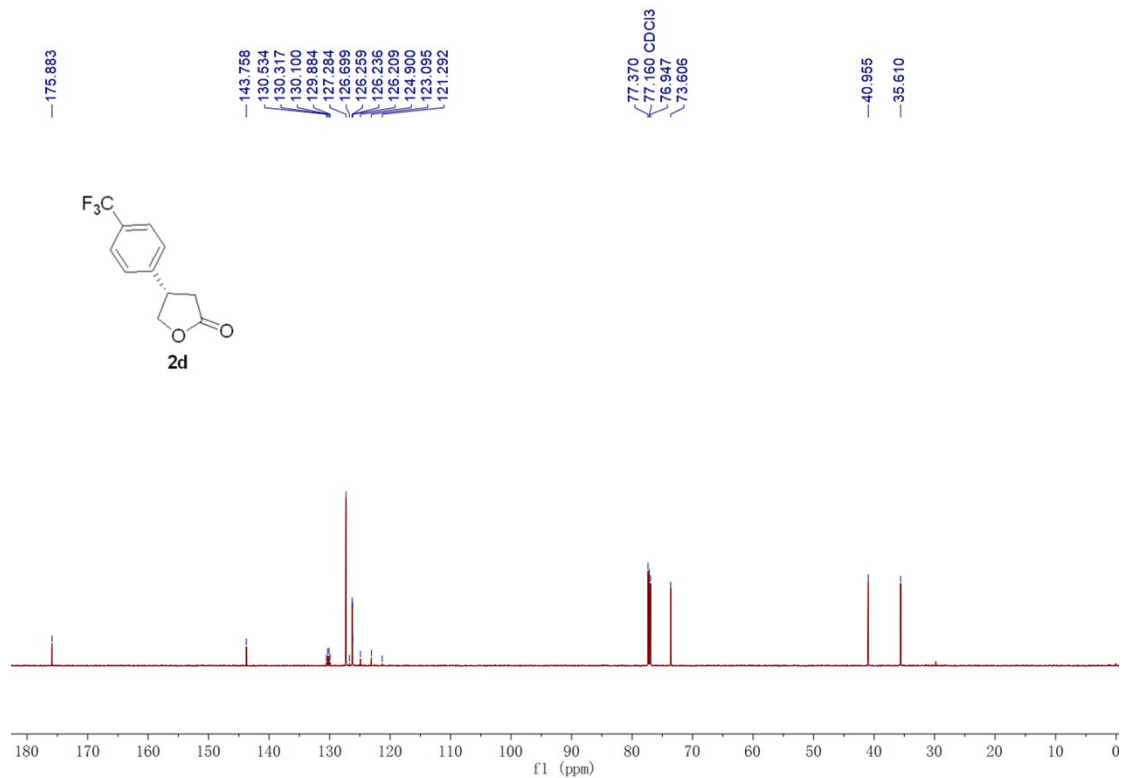

$^1\text{H}$  NMR (600 MHz,  $\text{CDCl}_3$ )

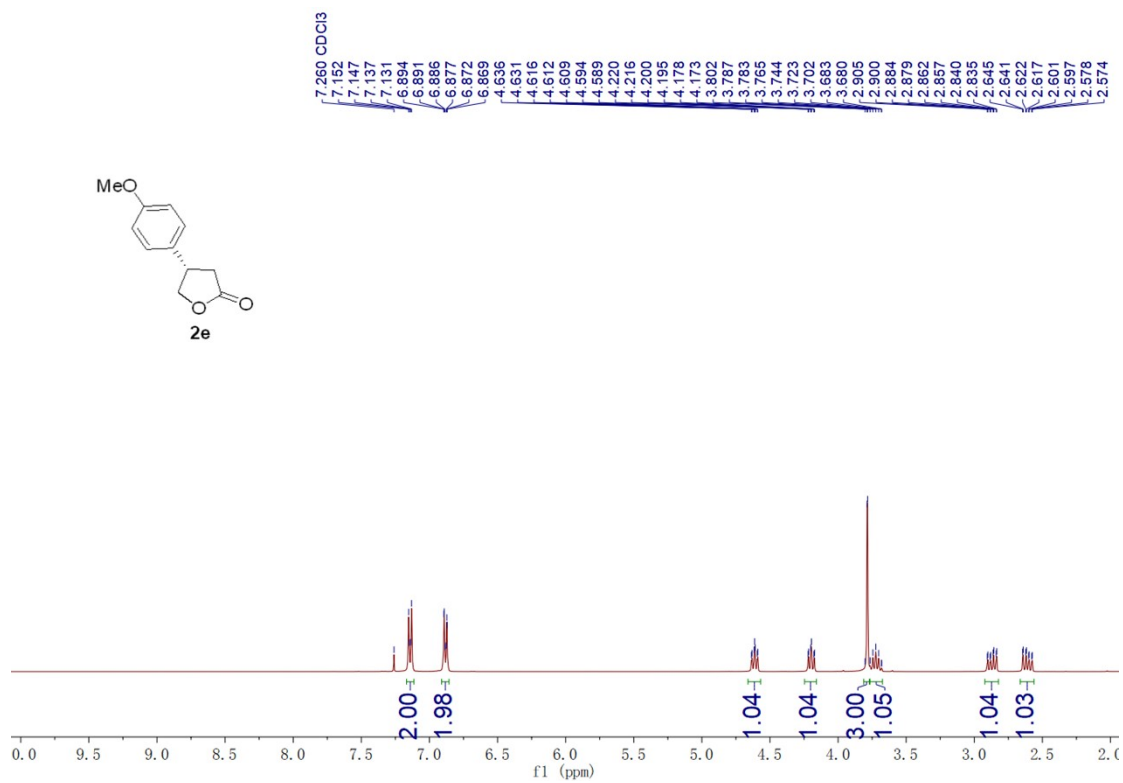

$^{13}\text{C}$  NMR (150 MHz,  $\text{CDCl}_3$ )

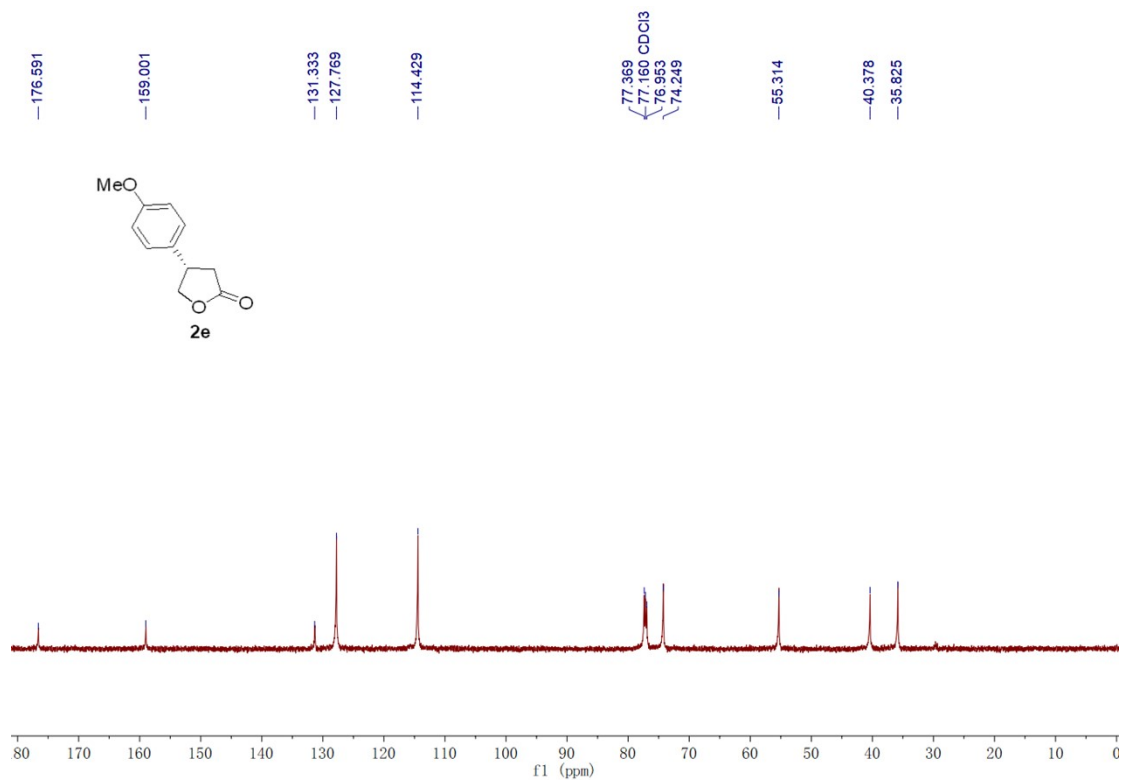

$^1\text{H}$  NMR (600 MHz,  $\text{CDCl}_3$ )

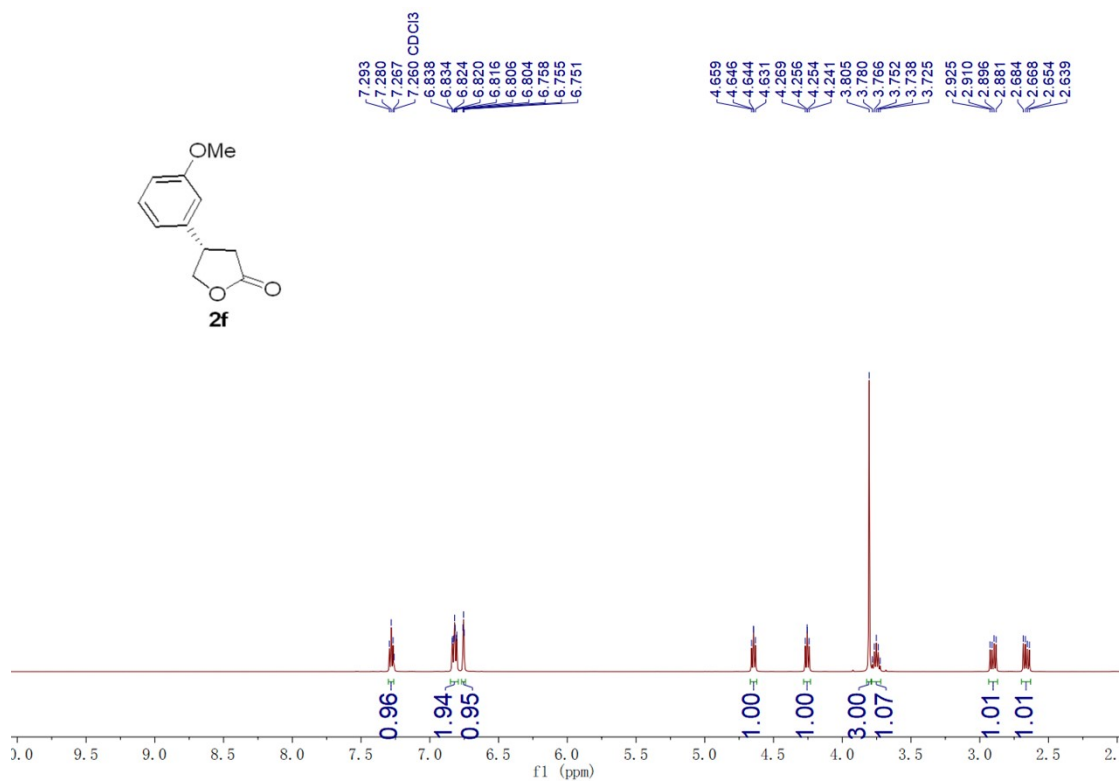

$^{13}\text{C}$  NMR (150 MHz,  $\text{CDCl}_3$ )

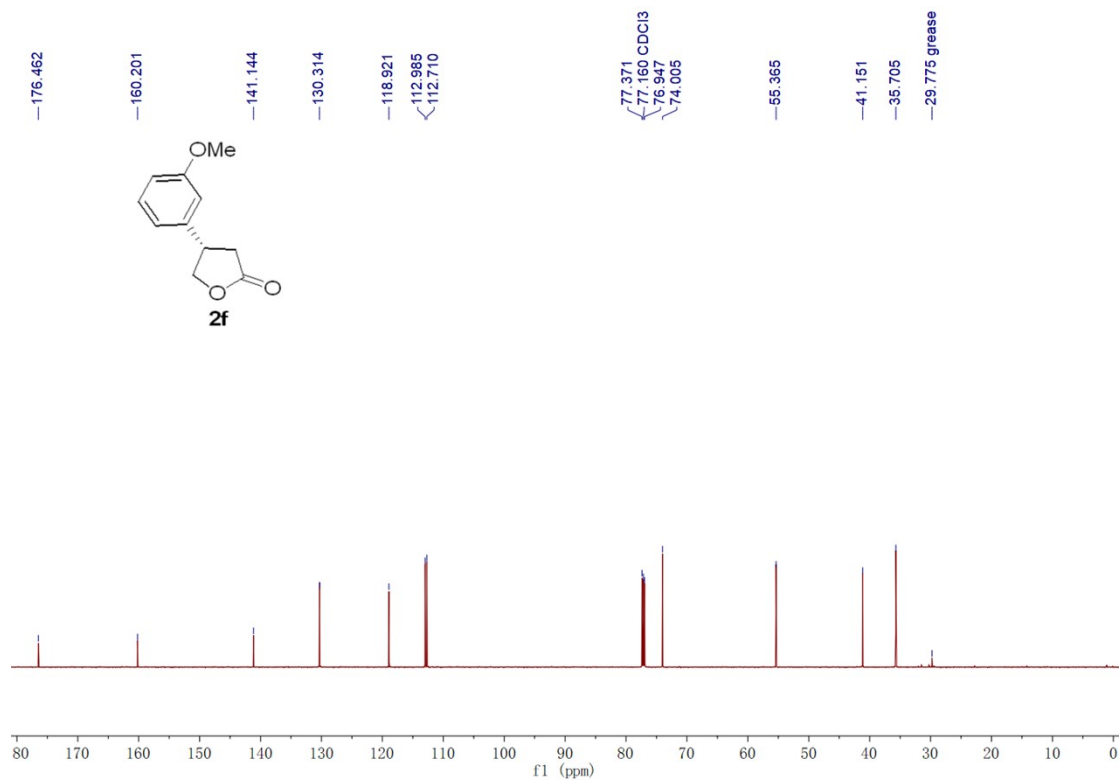

$^1\text{H}$  NMR (600 MHz,  $\text{CDCl}_3$ )

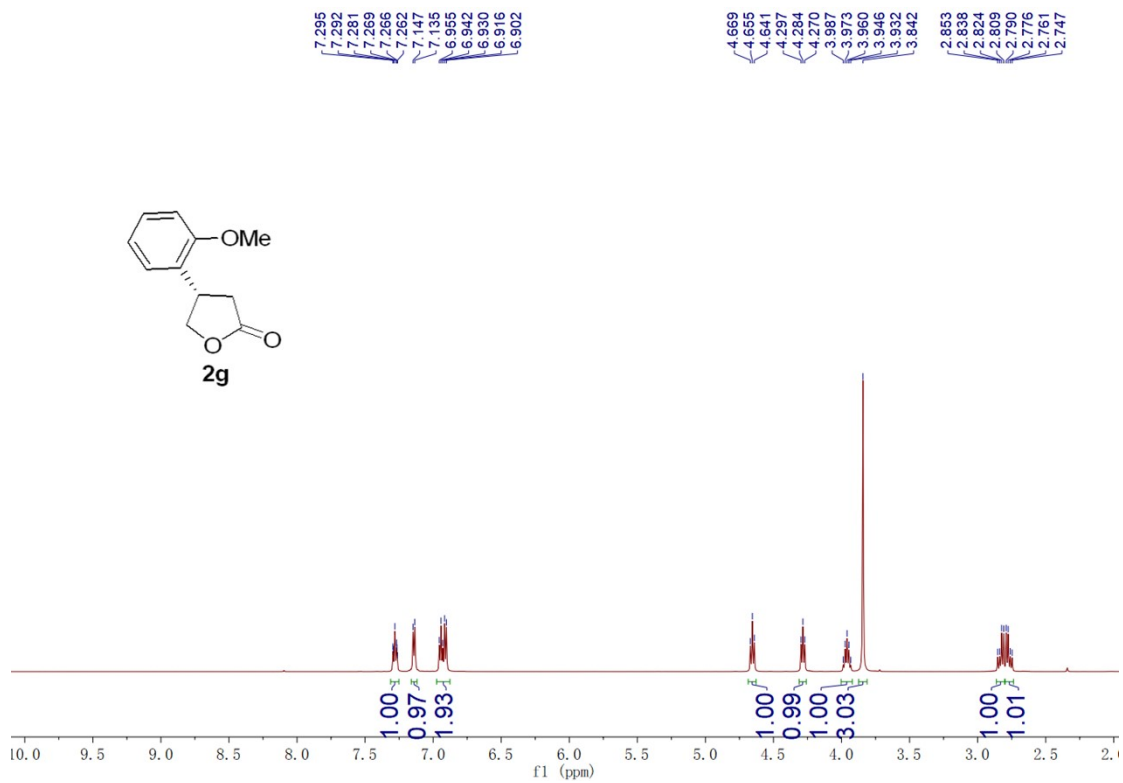

$^{13}\text{C}$  NMR (150 MHz,  $\text{CDCl}_3$ )

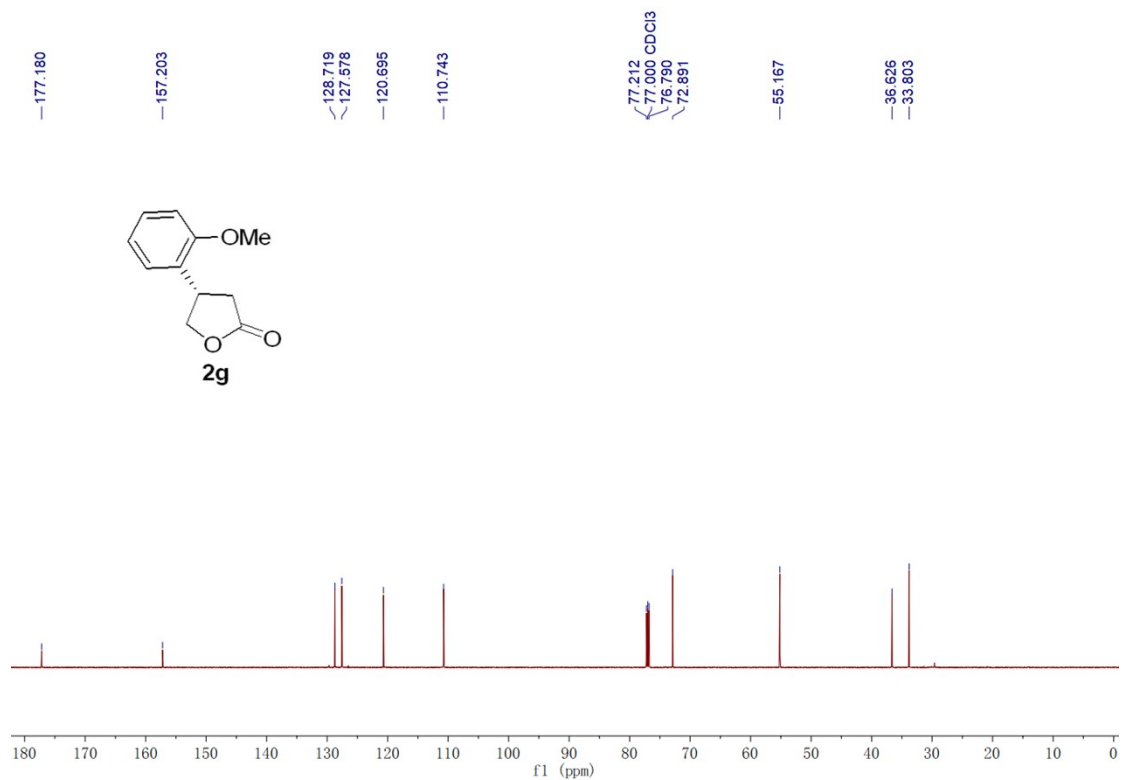

$^1\text{H}$  NMR (600 MHz,  $\text{CDCl}_3$ )

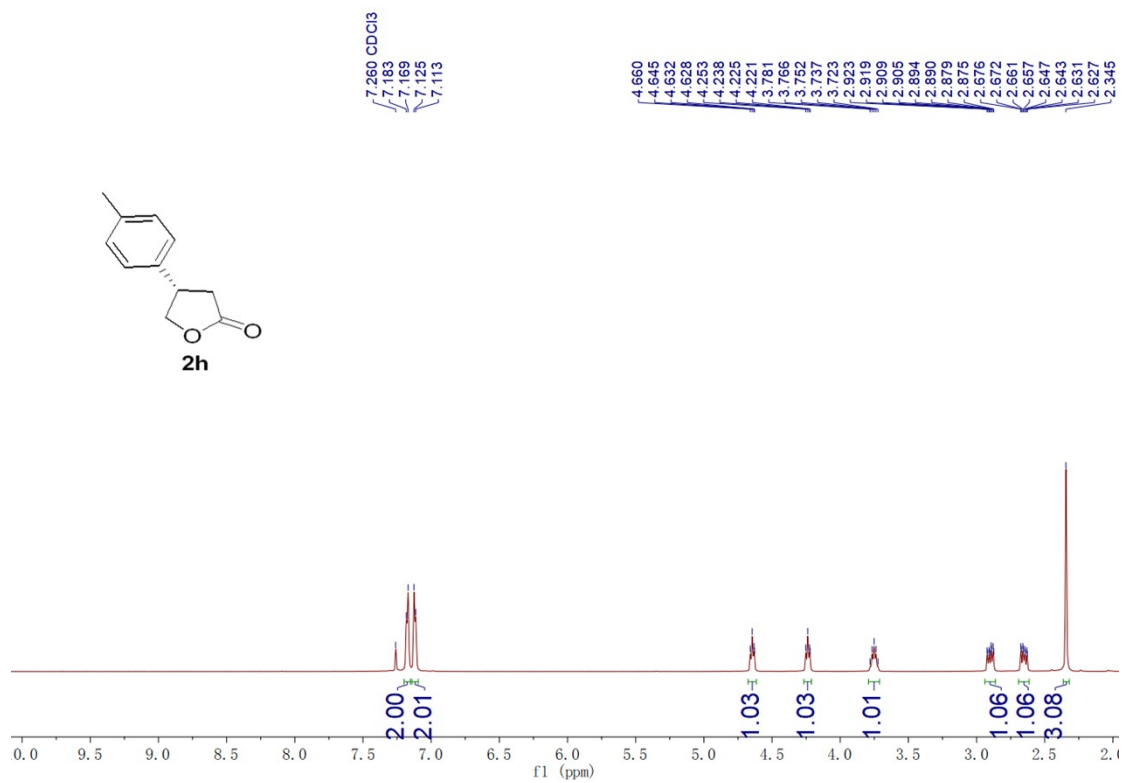

$^{13}\text{C}$  NMR (150 MHz,  $\text{CDCl}_3$ )

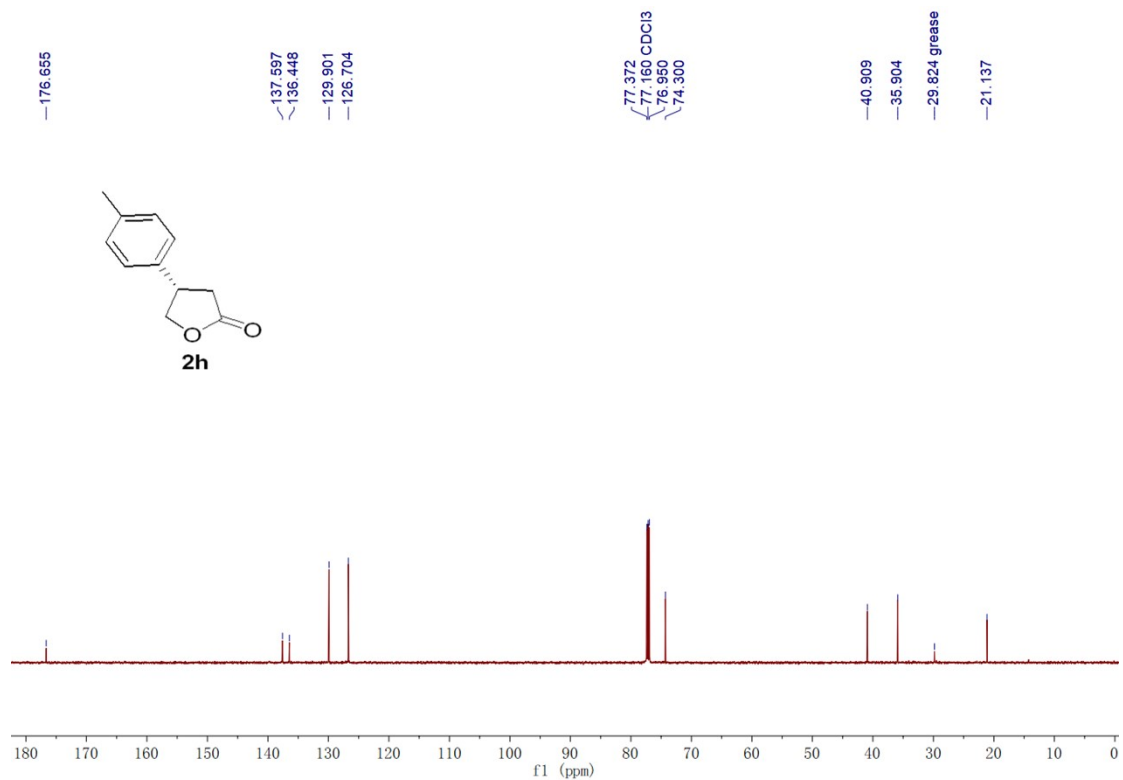

<sup>1</sup>H NMR (600 MHz, CDCl<sub>3</sub>)

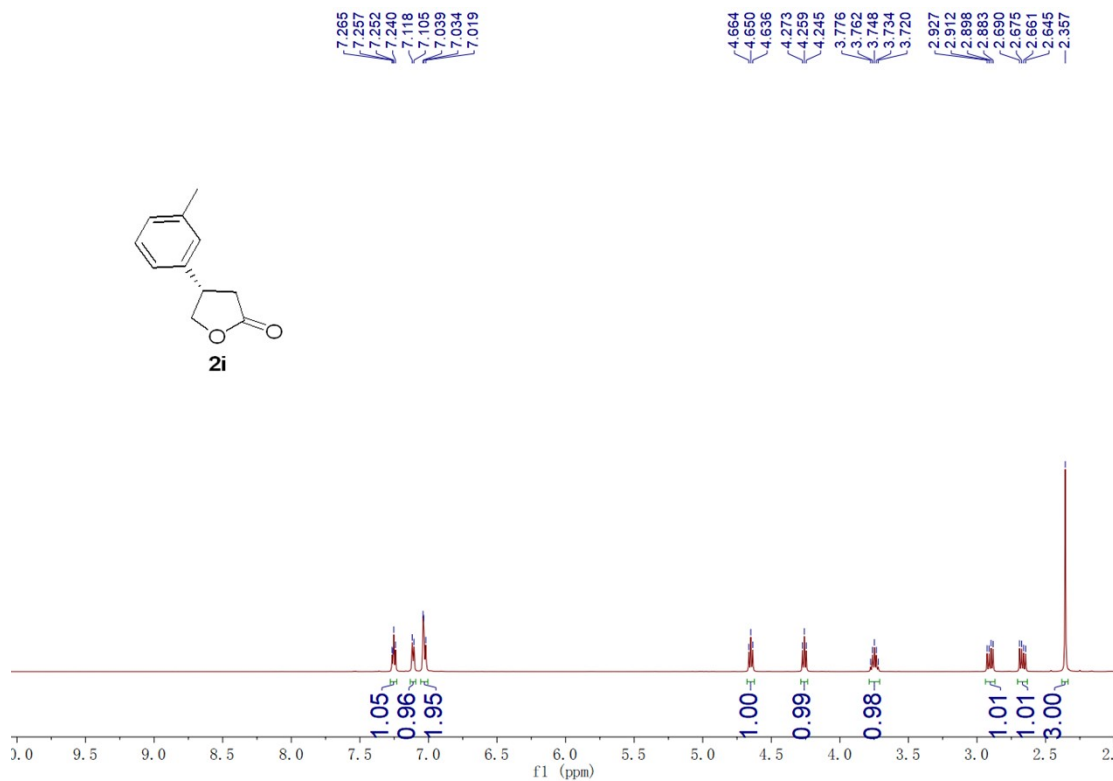

<sup>13</sup>C NMR (150 MHz, CDCl<sub>3</sub>)

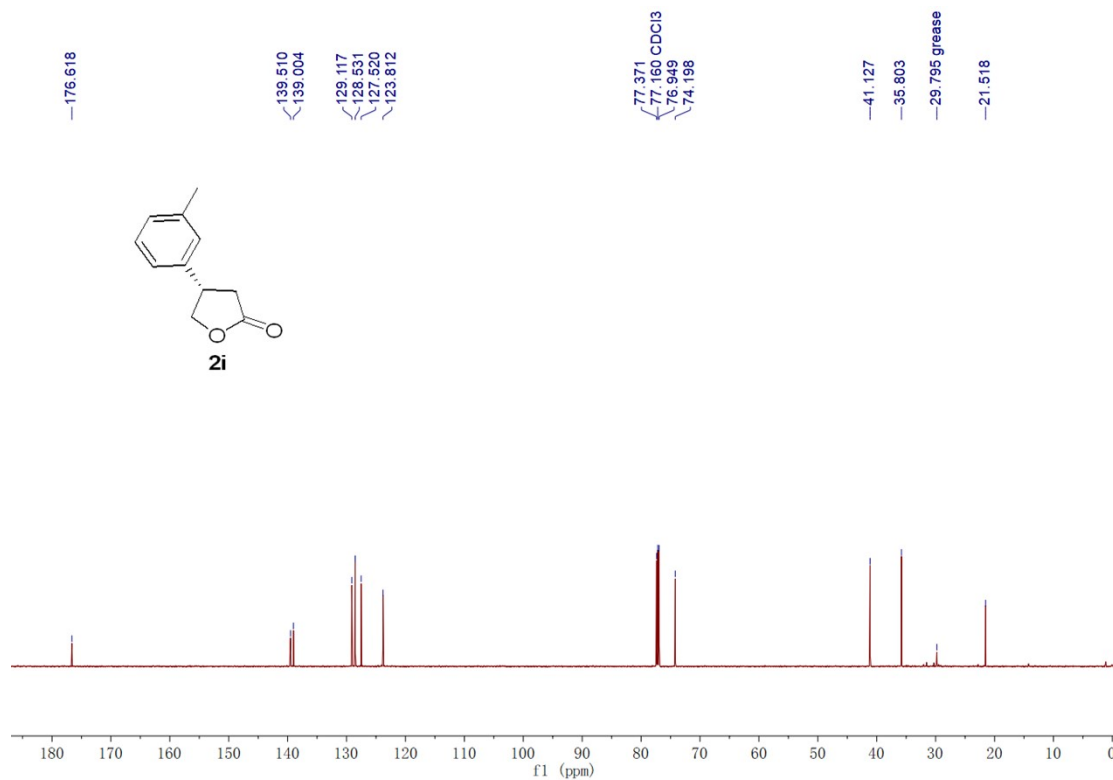



$^1\text{H}$  NMR (600 MHz,  $\text{CDCl}_3$ )

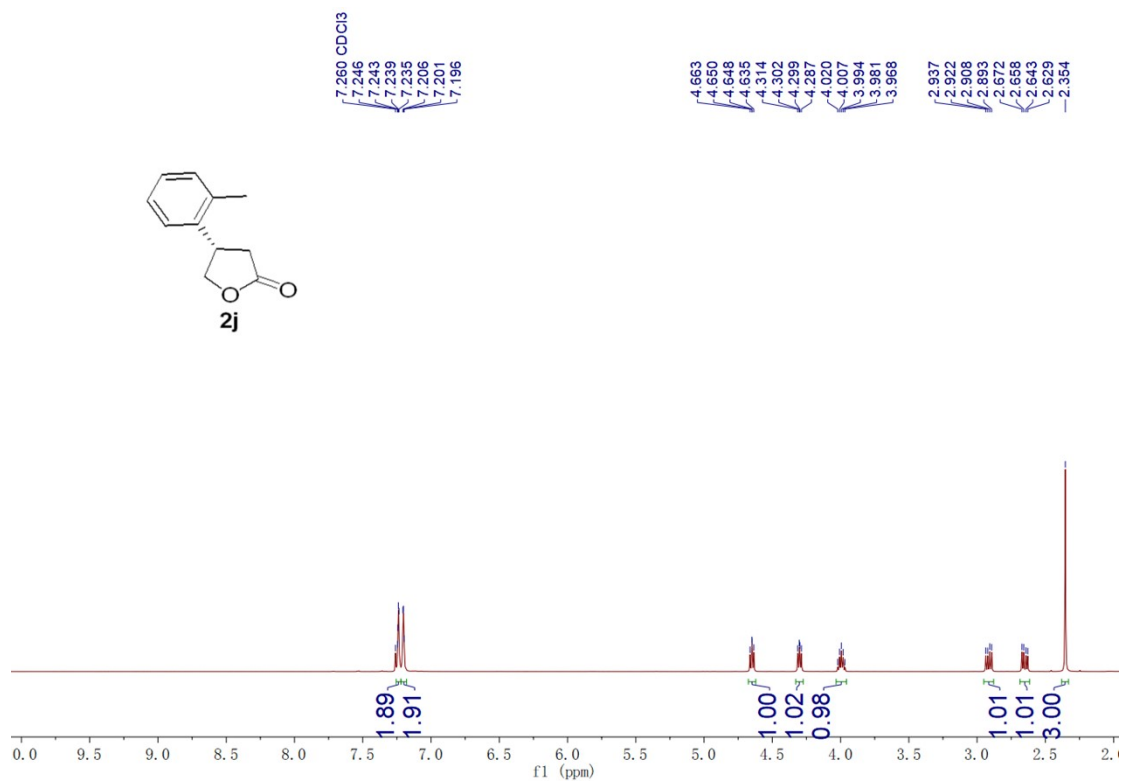

$^{13}\text{C}$  NMR (150 MHz,  $\text{CDCl}_3$ )

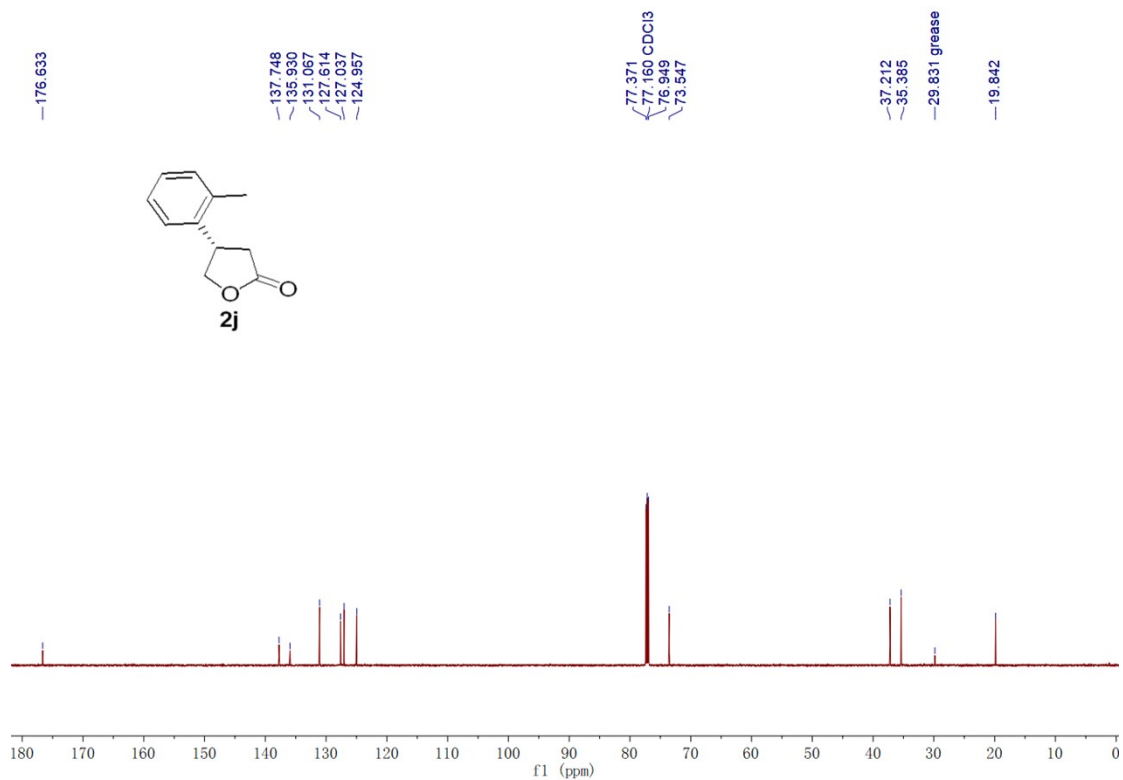

$^1\text{H}$  NMR (600 MHz,  $\text{CDCl}_3$ )

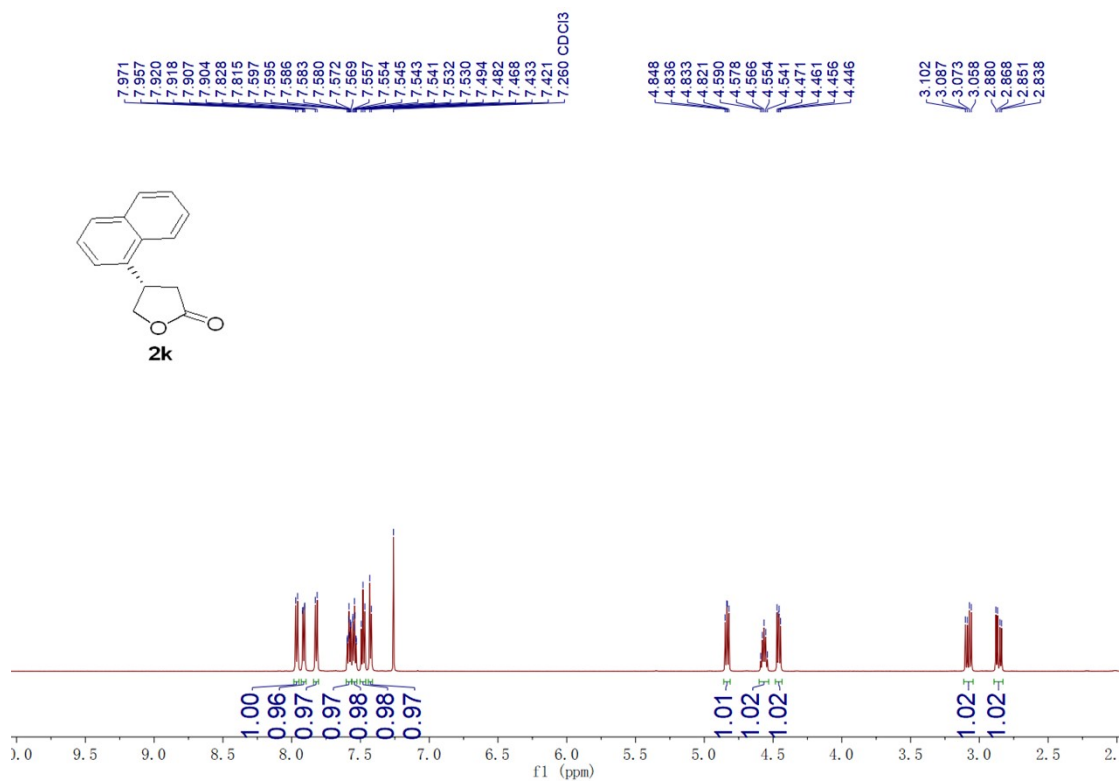

$^{13}\text{C}$  NMR (150 MHz,  $\text{CDCl}_3$ )

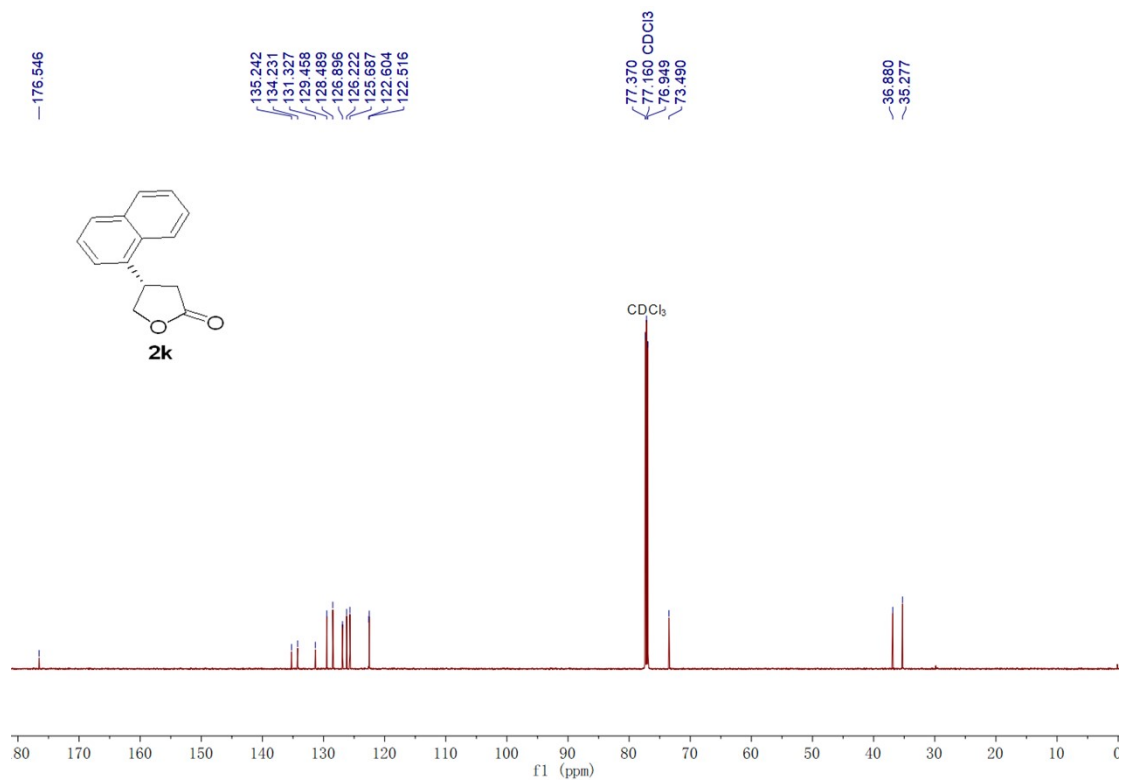

$^1\text{H}$  NMR (600 MHz,  $\text{CDCl}_3$ )

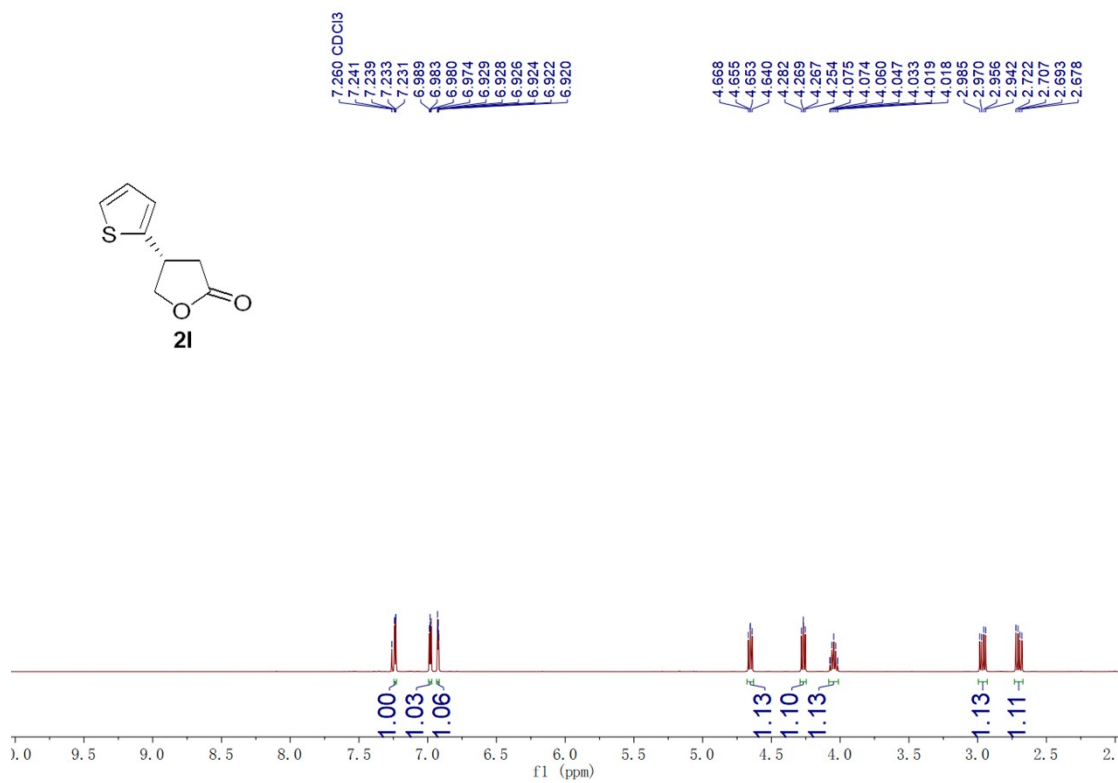

$^{13}\text{C}$  NMR (150 MHz,  $\text{CDCl}_3$ )

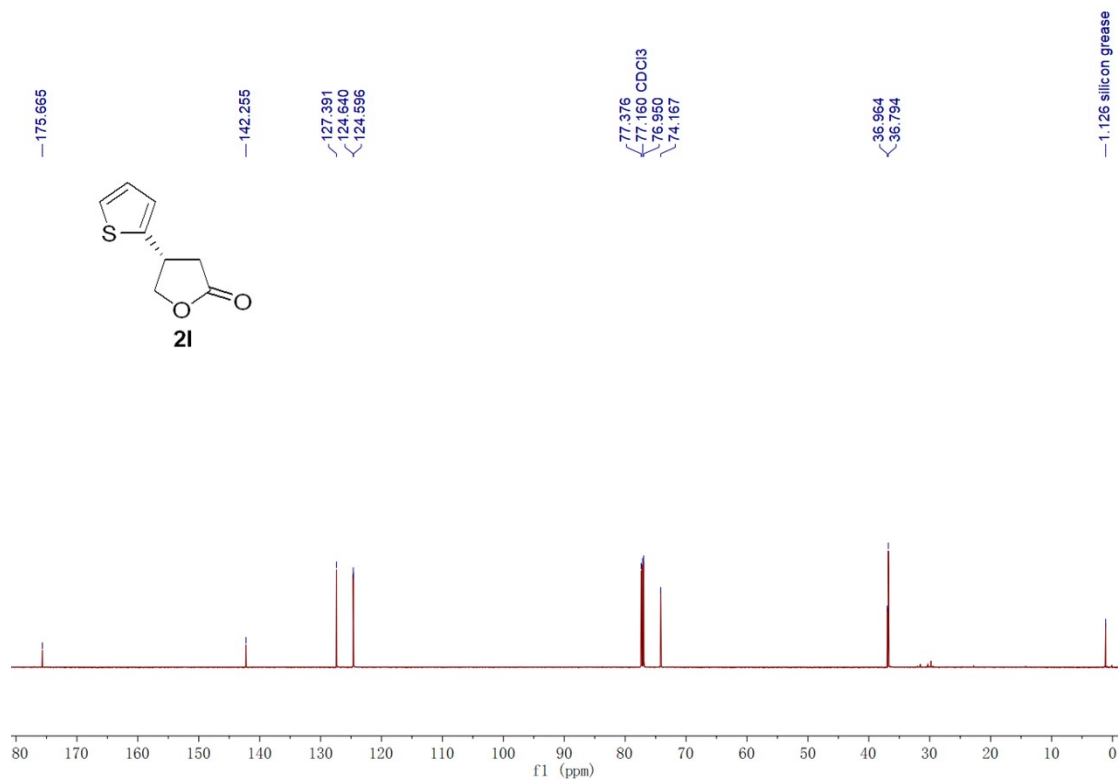

$^1\text{H}$  NMR (600 MHz,  $\text{CDCl}_3$ )

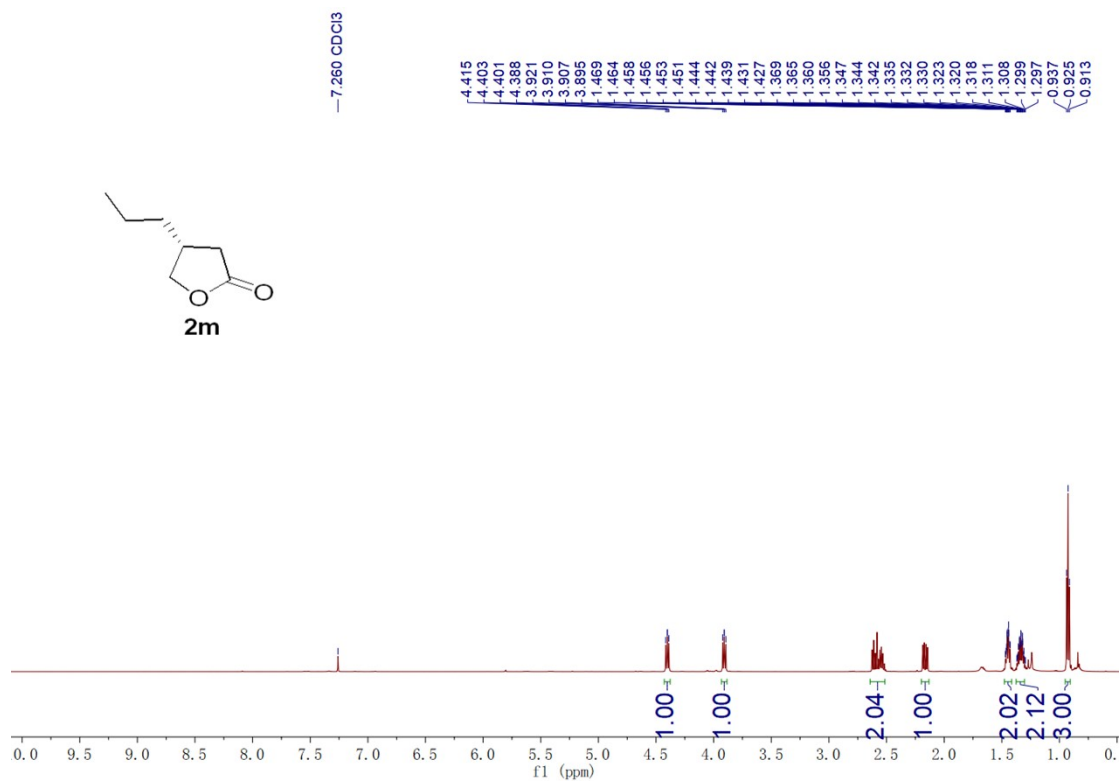

$^{13}\text{C}$  NMR (150 MHz,  $\text{CDCl}_3$ )

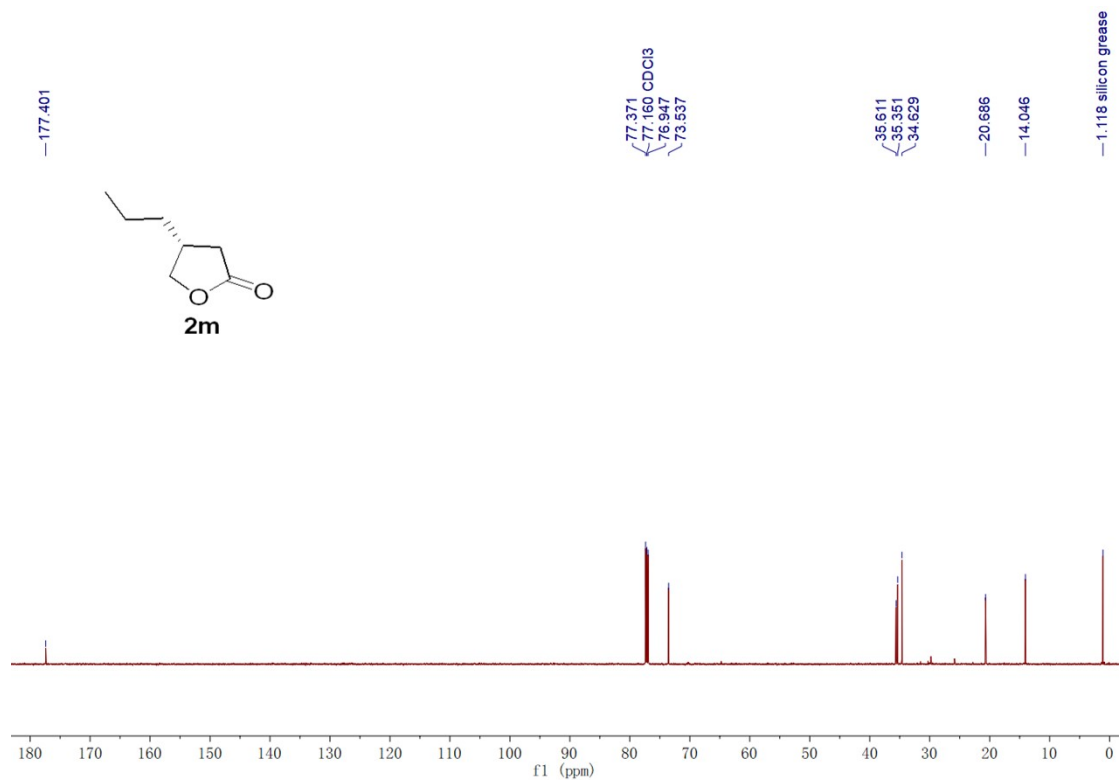

$^1\text{H}$  NMR (600 MHz,  $\text{CDCl}_3$ )

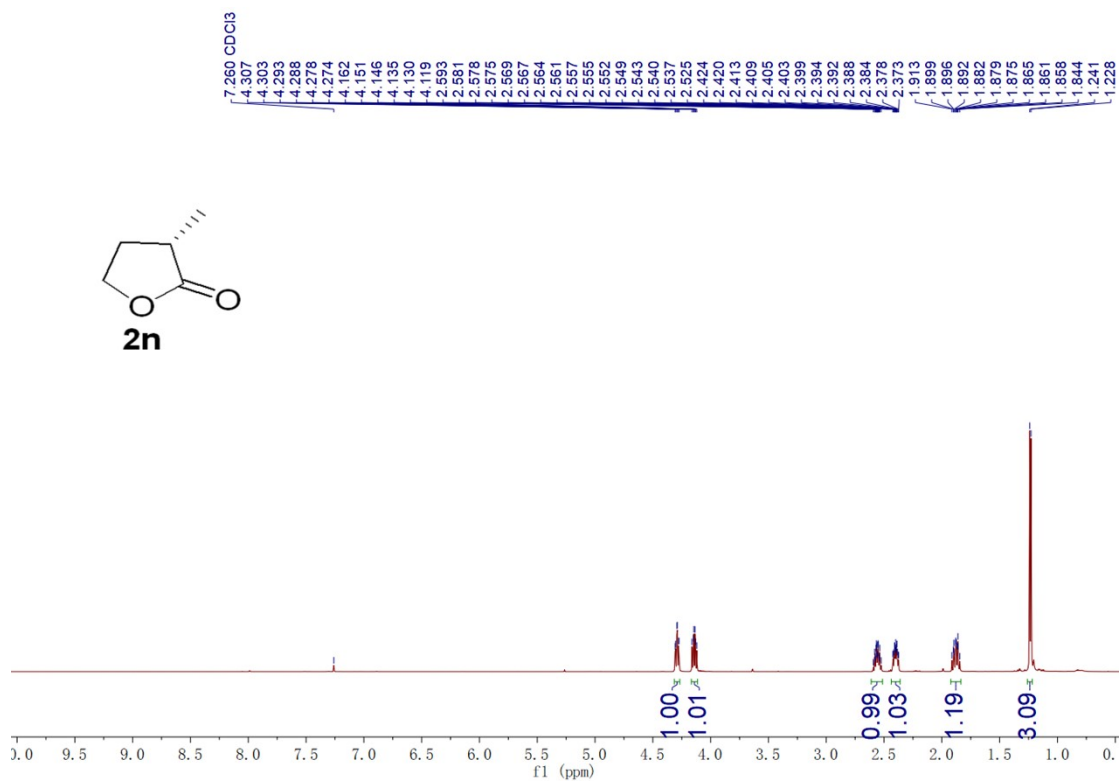

$^{13}\text{C}$  NMR (150 MHz,  $\text{CDCl}_3$ )

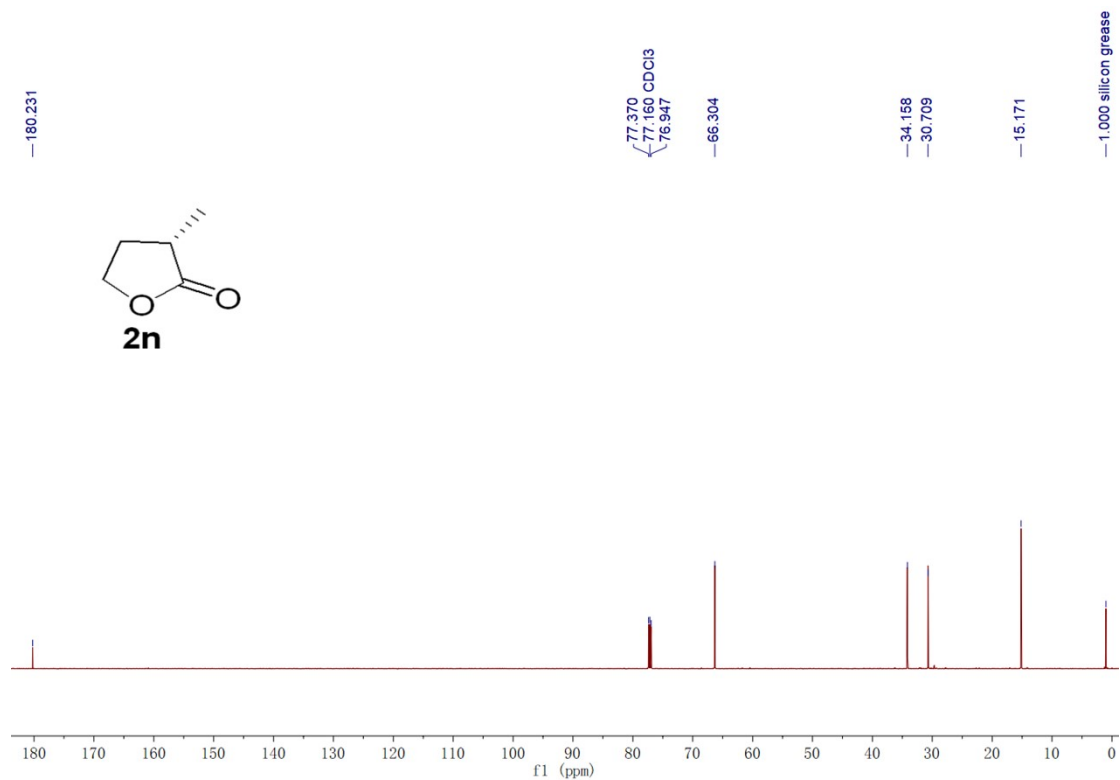

# <sup>1</sup>H NMR (600 MHz, CDCl<sub>3</sub>)

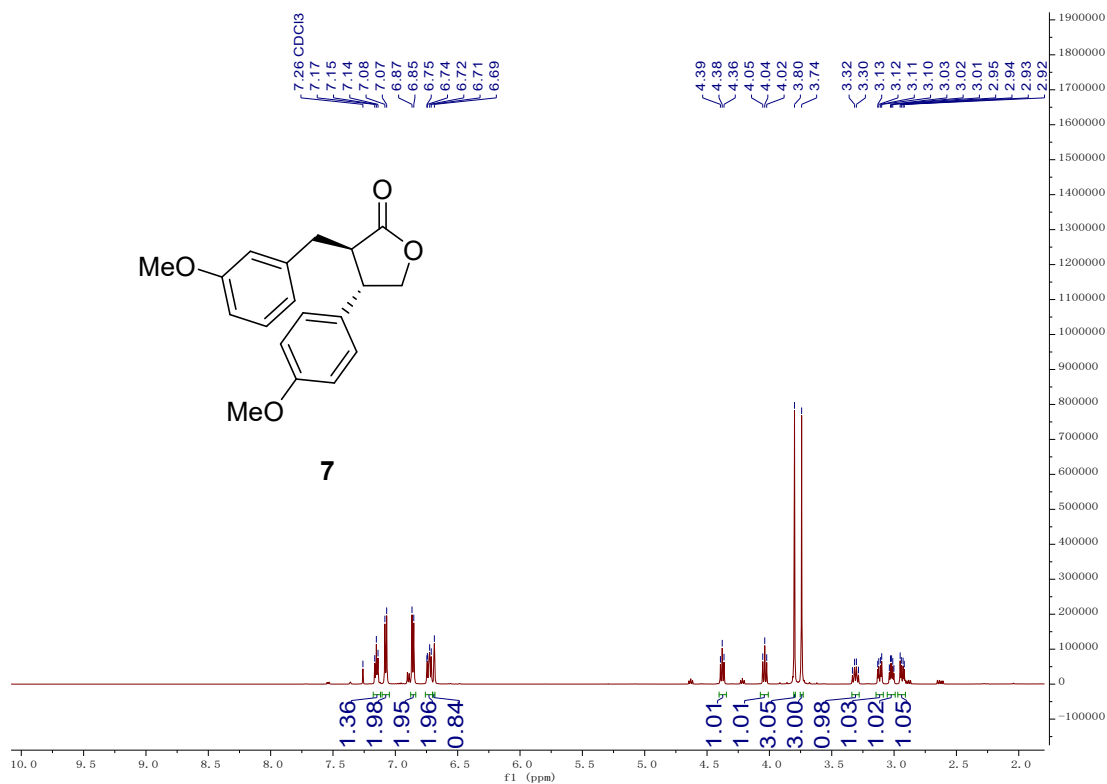

# <sup>13</sup>C NMR (150 MHz, CDCl<sub>3</sub>)

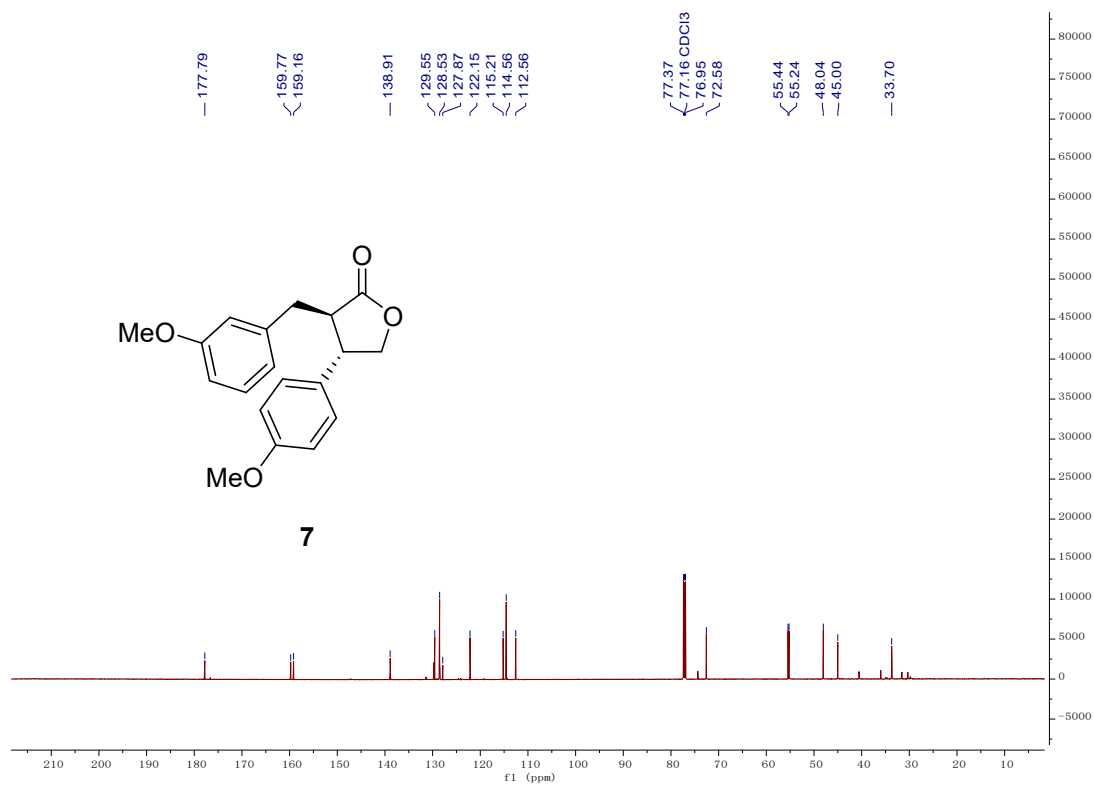

## 7. HPLC Spectra

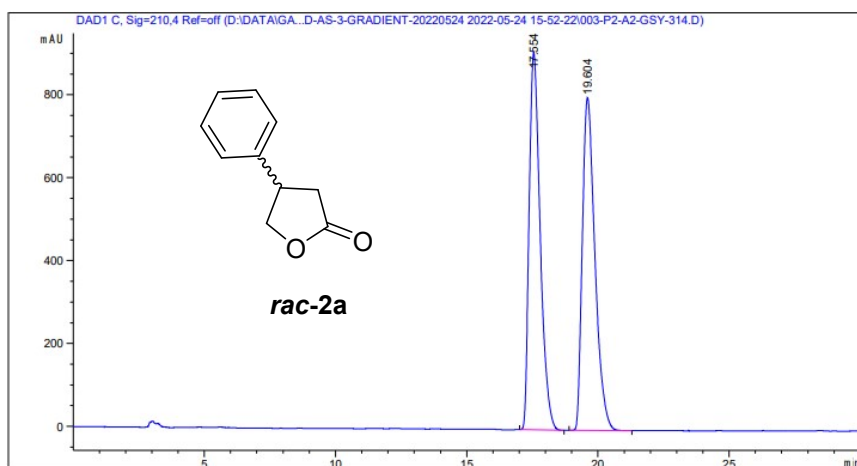

=====  
 Area Percent Report  
 =====

Sorted By : Signal  
 Multiplier : 1.0000  
 Dilution : 1.0000  
 Use Multiplier & Dilution Factor with ISTDs

Signal 1: DAD1 C, Sig=210,4 Ref=off

| Peak # | RetTime [min] | Type | Width [min] | Area [mAU*s] | Height [mAU] | Area %  |
|--------|---------------|------|-------------|--------------|--------------|---------|
| 1      | 17.554        | BB   | 0.4583      | 2.65900e4    | 911.65179    | 49.8375 |
| 2      | 19.604        | BB   | 0.5249      | 2.67634e4    | 802.97314    | 50.1625 |

Totals : 5.33534e4 1714.62494

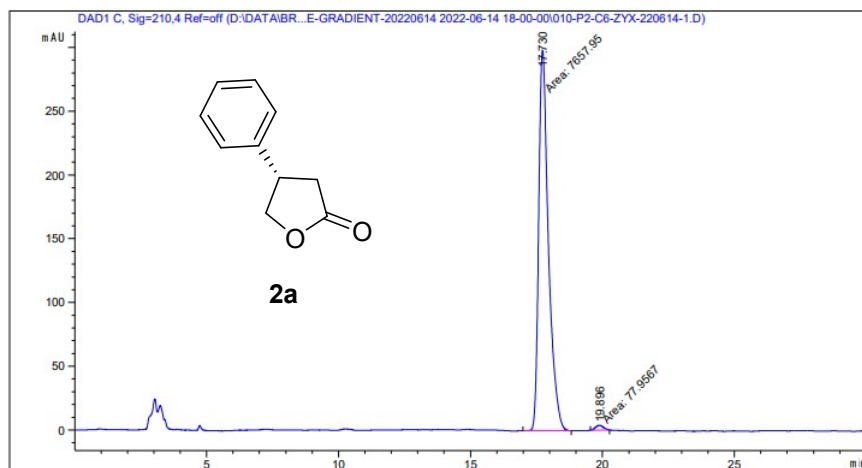

=====  
 Area Percent Report  
 =====

Sorted By : Signal  
 Multiplier : 1.0000  
 Dilution : 1.0000  
 Use Multiplier & Dilution Factor with ISTDs

Signal 1: DAD1 C, Sig=210,4 Ref=off

| Peak # | RetTime [min] | Type | Width [min] | Area [mAU*s] | Height [mAU] | Area %  |
|--------|---------------|------|-------------|--------------|--------------|---------|
| 1      | 17.730        | MM   | 0.4278      | 7657.94775   | 298.33279    | 98.9923 |
| 2      | 19.896        | MM   | 0.3520      | 77.95670     | 3.69120      | 1.0077  |

Totals : 7735.90446 302.02400

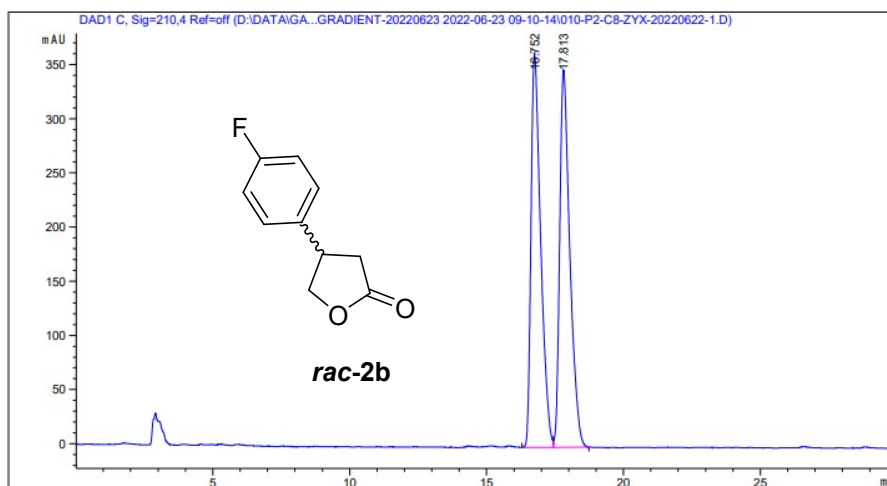

=====  
Area Percent Report  
=====

Sorted By : Signal  
Multiplier : 1.0000  
Dilution : 1.0000  
Use Multiplier & Dilution Factor with ISTDs

Signal 1: DAD1 C, Sig=210,4 Ref=off

| Peak # | RetTime [min] | Type | Width [min] | Area [mAU*s] | Height [mAU] | Area %  |
|--------|---------------|------|-------------|--------------|--------------|---------|
| 1      | 16.752        | BV   | 0.3642      | 8928.54395   | 363.90018    | 49.9102 |
| 2      | 17.813        | VB   | 0.3821      | 8960.68359   | 348.40439    | 50.0898 |

Totals : 1.78892e4 712.30457

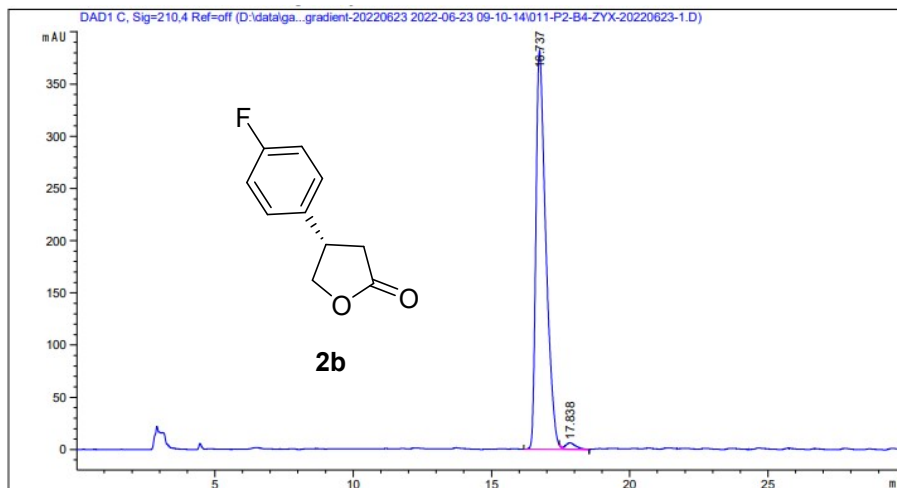

=====  
Area Percent Report  
=====

Sorted By : Signal  
Multiplier : 1.0000  
Dilution : 1.0000  
Use Multiplier & Dilution Factor with ISTDs

Signal 1: DAD1 C, Sig=210,4 Ref=off

| Peak # | RetTime [min] | Type | Width [min] | Area [mAU*s] | Height [mAU] | Area %  |
|--------|---------------|------|-------------|--------------|--------------|---------|
| 1      | 16.737        | BV R | 0.3715      | 9537.99414   | 381.70267    | 98.3777 |
| 2      | 17.838        | VB E | 0.3653      | 157.28676    | 6.25718      | 1.6223  |

Totals : 9695.28090 387.95985



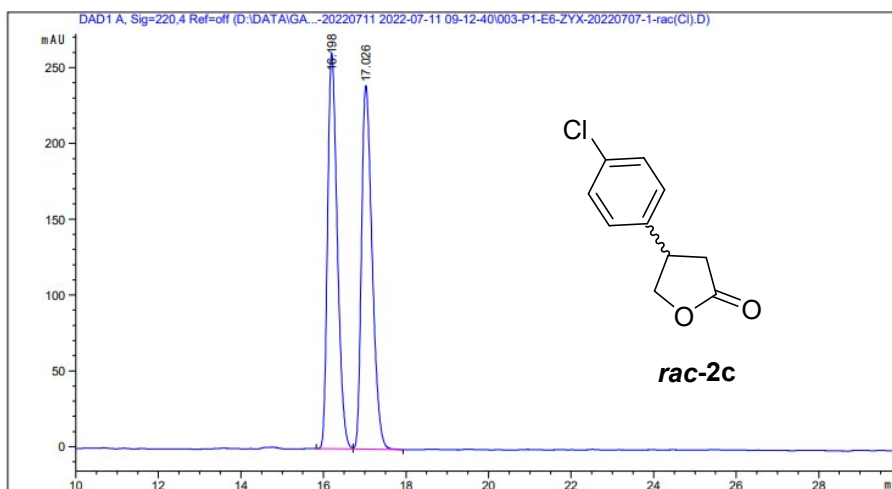

=====  
 Area Percent Report  
 =====

Sorted By : Signal  
 Multiplier : 1.0000  
 Dilution : 1.0000  
 Use Multiplier & Dilution Factor with ISTDs

Signal 1: DAD1 A, Sig=220,4 Ref=off

| Peak # | RetTime [min] | Type | Width [min] | Area [mAU*s] | Height [mAU] | Area %  |
|--------|---------------|------|-------------|--------------|--------------|---------|
| 1      | 16.198        | BV   | 0.2533      | 4278.80371   | 260.94119    | 49.9156 |
| 2      | 17.026        | VB   | 0.2769      | 4293.26758   | 239.82726    | 50.0844 |

Totals : 8572.07129 500.76845

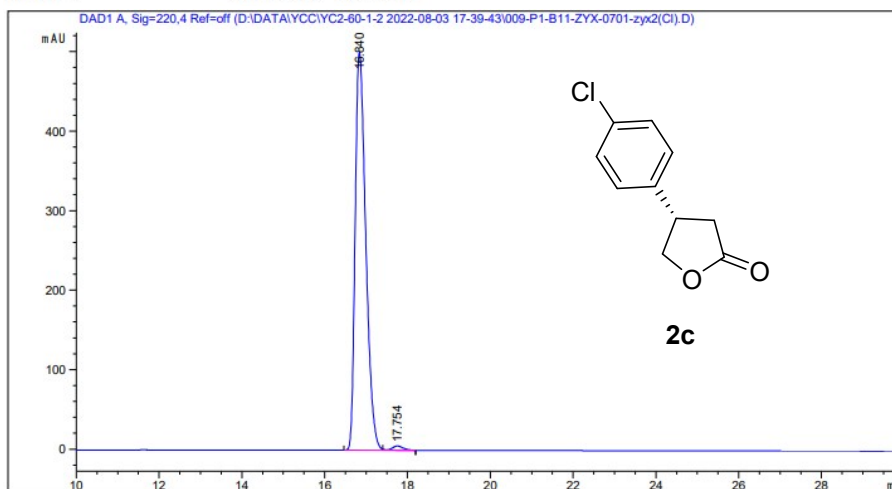

=====  
 Area Percent Report  
 =====

Sorted By : Signal  
 Multiplier : 1.0000  
 Dilution : 1.0000  
 Use Multiplier & Dilution Factor with ISTDs

Signal 1: DAD1 A, Sig=220,4 Ref=off

| Peak # | RetTime [min] | Type | Width [min] | Area [mAU*s] | Height [mAU] | Area %  |
|--------|---------------|------|-------------|--------------|--------------|---------|
| 1      | 16.840        | BV R | 0.2732      | 8892.00293   | 500.57700    | 98.9318 |
| 2      | 17.754        | VB E | 0.2755      | 96.00578     | 5.39840      | 1.0682  |

Totals : 8988.00871 505.97540

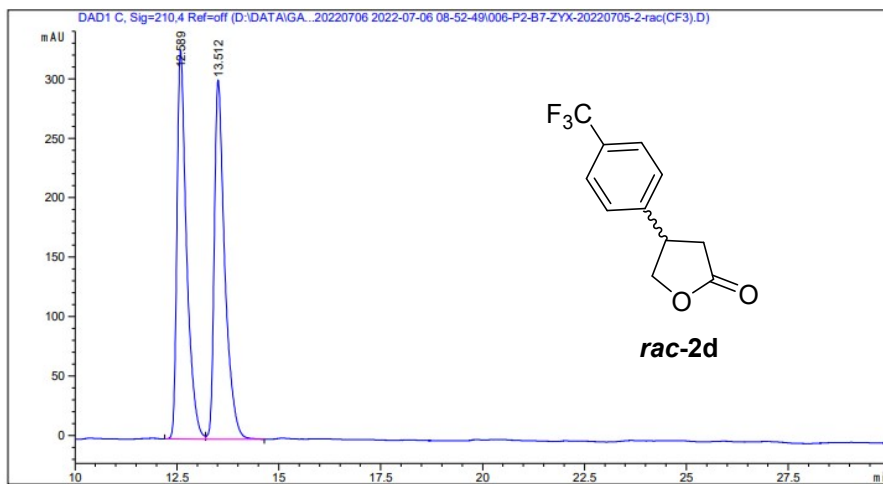

=====  
Area Percent Report  
=====

Sorted By : Signal  
Multiplier : 1.0000  
Dilution : 1.0000  
Use Multiplier & Dilution Factor with ISTDs

Signal 1: DAD1 C, Sig=210,4 Ref=off

| Peak # | RetTime [min] | Type | Width [min] | Area [mAU*s] | Height [mAU] | Area %  |
|--------|---------------|------|-------------|--------------|--------------|---------|
| 1      | 12.589        | BV   | 0.2439      | 5373.98926   | 326.77206    | 49.7840 |
| 2      | 13.512        | VB   | 0.2677      | 5420.62207   | 301.64206    | 50.2160 |

Totals : 1.07946e4 628.41412

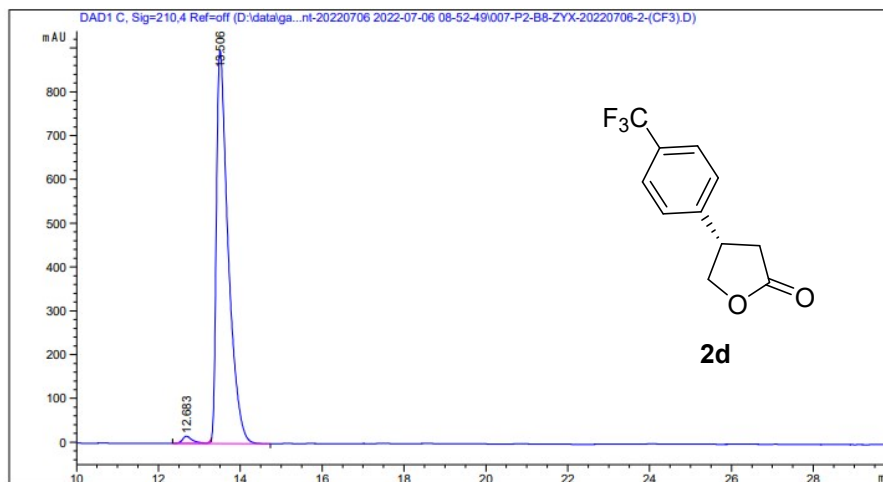

=====  
Area Percent Report  
=====

Sorted By : Signal  
Multiplier : 1.0000  
Dilution : 1.0000  
Use Multiplier & Dilution Factor with ISTDs

Signal 1: DAD1 C, Sig=210,4 Ref=off

| Peak # | RetTime [min] | Type | Width [min] | Area [mAU*s] | Height [mAU] | Area %  |
|--------|---------------|------|-------------|--------------|--------------|---------|
| 1      | 12.683        | BV E | 0.2486      | 280.90237    | 16.33854     | 1.5400  |
| 2      | 13.506        | VB R | 0.2956      | 1.79598e4    | 896.89978    | 98.4600 |

Totals : 1.82407e4 913.23833

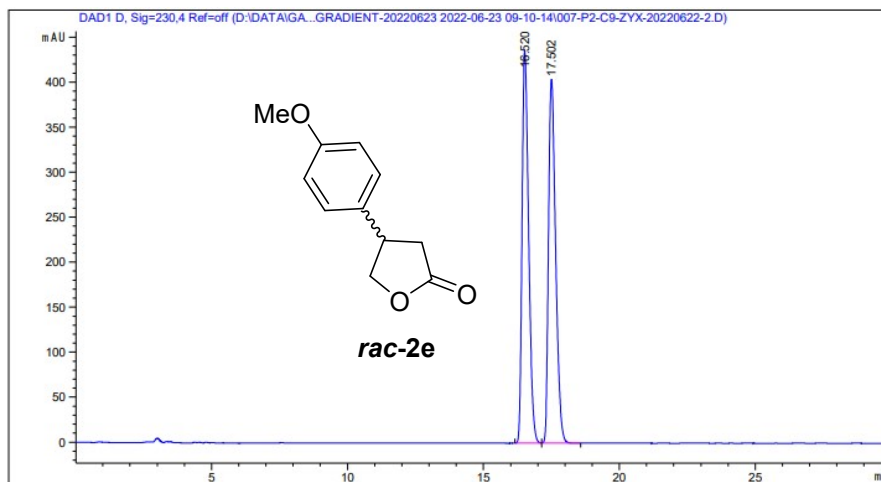

=====  
 Area Percent Report  
 =====

Sorted By : Signal  
 Multiplier : 1.0000  
 Dilution : 1.0000  
 Use Multiplier & Dilution Factor with ISTDs

Signal 1: DAD1 D, Sig=230,4 Ref=off

| Peak # | RetTime [min] | Type | Width [min] | Area [mAU*s] | Height [mAU] | Area %  |
|--------|---------------|------|-------------|--------------|--------------|---------|
| 1      | 16.520        | BB   | 0.2617      | 7315.36670   | 436.05536    | 49.9025 |
| 2      | 17.502        | BB   | 0.2822      | 7343.96191   | 403.75708    | 50.0975 |

Totals : 1.46593e4 839.81244

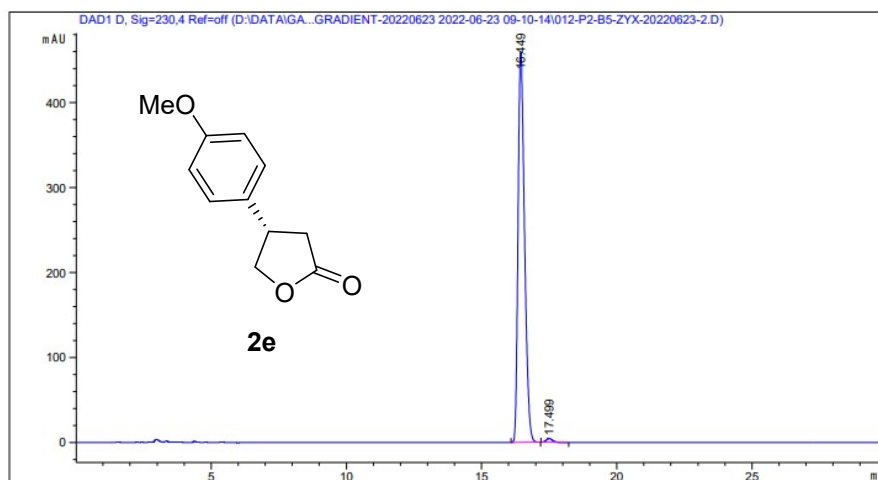

=====  
 Area Percent Report  
 =====

Sorted By : Signal  
 Multiplier : 1.0000  
 Dilution : 1.0000  
 Use Multiplier & Dilution Factor with ISTDs

Signal 1: DAD1 D, Sig=230,4 Ref=off

| Peak # | RetTime [min] | Type | Width [min] | Area [mAU*s] | Height [mAU] | Area %  |
|--------|---------------|------|-------------|--------------|--------------|---------|
| 1      | 16.449        | BB   | 0.2607      | 7658.74561   | 458.85324    | 99.0379 |
| 2      | 17.499        | BB   | 0.2533      | 74.40300     | 4.49002      | 0.9621  |

Totals : 7733.14861 463.34326

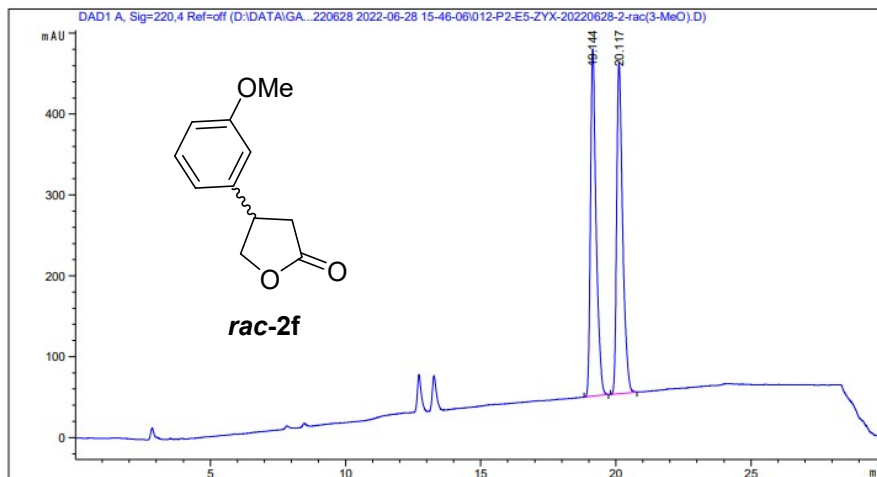

=====  
 Area Percent Report  
 =====

Sorted By : Signal  
 Multiplier : 1.0000  
 Dilution : 1.0000  
 Use Multiplier & Dilution Factor with ISTDs

Signal 1: DAD1 A, Sig=220,4 Ref=off

| Peak # | RetTime [min] | Type | Width [min] | Area [mAU*s] | Height [mAU] | Area %  |
|--------|---------------|------|-------------|--------------|--------------|---------|
| 1      | 19.144        | BB   | 0.2151      | 6219.23535   | 428.97073    | 49.8616 |
| 2      | 20.117        | BB   | 0.2263      | 6253.76221   | 409.12857    | 50.1384 |

Totals : 1.24730e4 838.09930

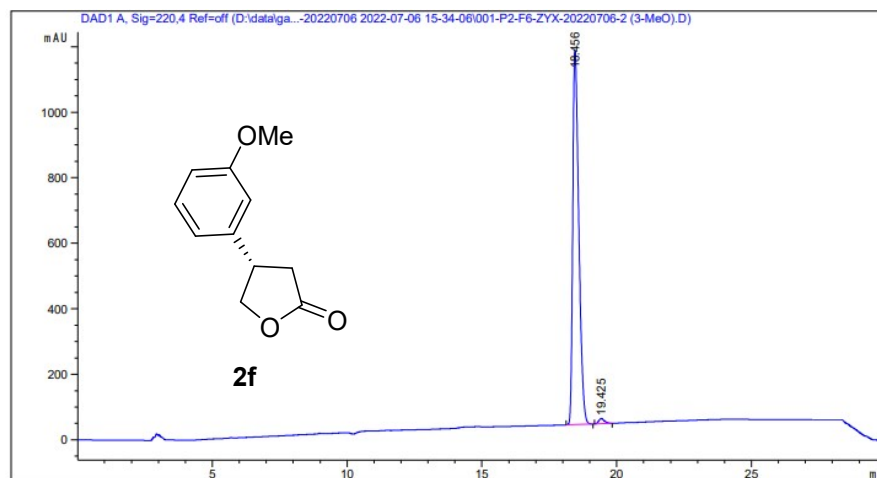

=====  
 Area Percent Report  
 =====

Sorted By : Signal  
 Multiplier : 1.0000  
 Dilution : 1.0000  
 Use Multiplier & Dilution Factor with ISTDs

Signal 1: DAD1 A, Sig=220,4 Ref=off

| Peak # | RetTime [min] | Type | Width [min] | Area [mAU*s] | Height [mAU] | Area %  |
|--------|---------------|------|-------------|--------------|--------------|---------|
| 1      | 18.456        | BB   | 0.2384      | 1.78153e4    | 1139.32507   | 98.7563 |
| 2      | 19.425        | BB   | 0.2143      | 224.36044    | 15.73641     | 1.2437  |

Totals : 1.80396e4 1155.06148

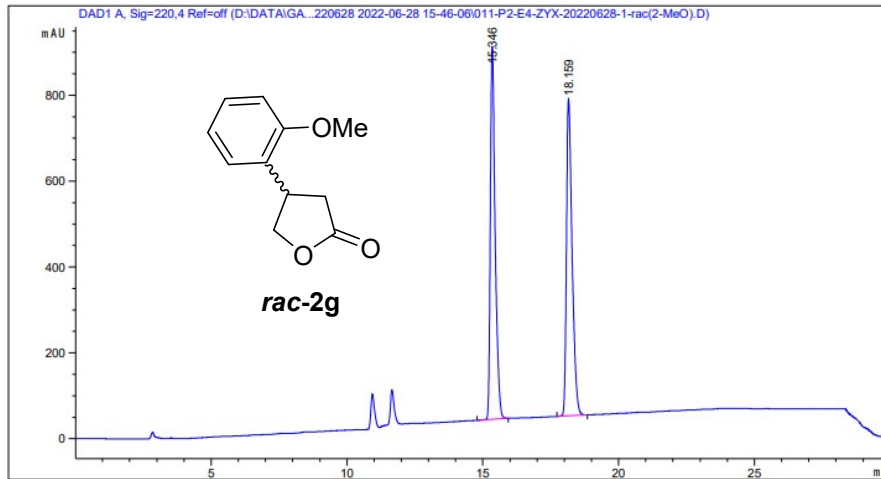

=====  
 Area Percent Report  
 =====

Sorted By : Signal  
 Multiplier : 1.0000  
 Dilution : 1.0000  
 Use Multiplier & Dilution Factor with ISTDs

Signal 1: DAD1 A, Sig=220,4 Ref=off

| Peak #   | RetTime [min] | Type | Width [min] | Area [mAU*s] | Height [mAU] | Area %  |
|----------|---------------|------|-------------|--------------|--------------|---------|
| 1        | 15.346        | BB   | 0.1813      | 1.06753e4    | 869.00891    | 49.9941 |
| 2        | 18.159        | BB   | 0.2168      | 1.06778e4    | 738.21930    | 50.0059 |
| Totals : |               |      |             | 2.13531e4    | 1607.22821   |         |

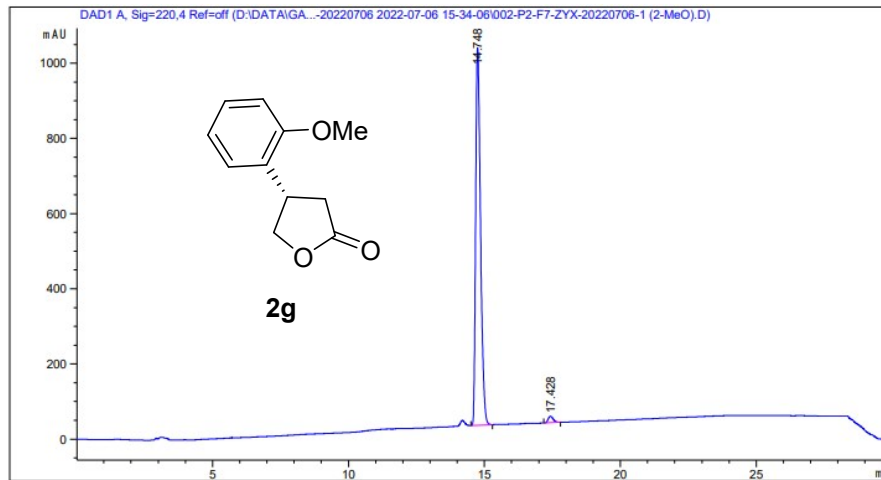

=====  
 Area Percent Report  
 =====

Sorted By : Signal  
 Multiplier : 1.0000  
 Dilution : 1.0000  
 Use Multiplier & Dilution Factor with ISTDs

Signal 1: DAD1 A, Sig=220,4 Ref=off

| Peak #   | RetTime [min] | Type | Width [min] | Area [mAU*s] | Height [mAU] | Area %  |
|----------|---------------|------|-------------|--------------|--------------|---------|
| 1        | 14.748        | BB   | 0.1877      | 1.23867e4    | 1005.42017   | 98.2339 |
| 2        | 17.428        | BB   | 0.1947      | 222.69682    | 17.23898     | 1.7661  |
| Totals : |               |      |             | 1.26094e4    | 1022.65915   |         |

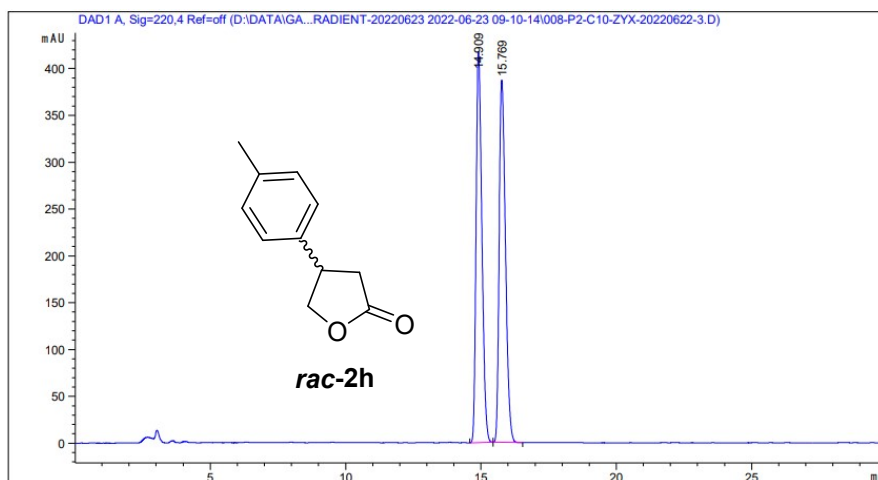

=====  
 Area Percent Report  
 =====

Sorted By : Signal  
 Multiplier : 1.0000  
 Dilution : 1.0000  
 Use Multiplier & Dilution Factor with ISTDs

Signal 1: DAD1 A, Sig=220,4 Ref=off

| Peak # | RetTime [min] | Type | Width [min] | Area [mAU*s] | Height [mAU] | Area %  |
|--------|---------------|------|-------------|--------------|--------------|---------|
| 1      | 14.909        | BB   | 0.2334      | 6269.33398   | 416.94226    | 49.9810 |
| 2      | 15.769        | BB   | 0.2512      | 6274.09180   | 386.96332    | 50.0190 |

Totals : 1.25434e4 803.90558

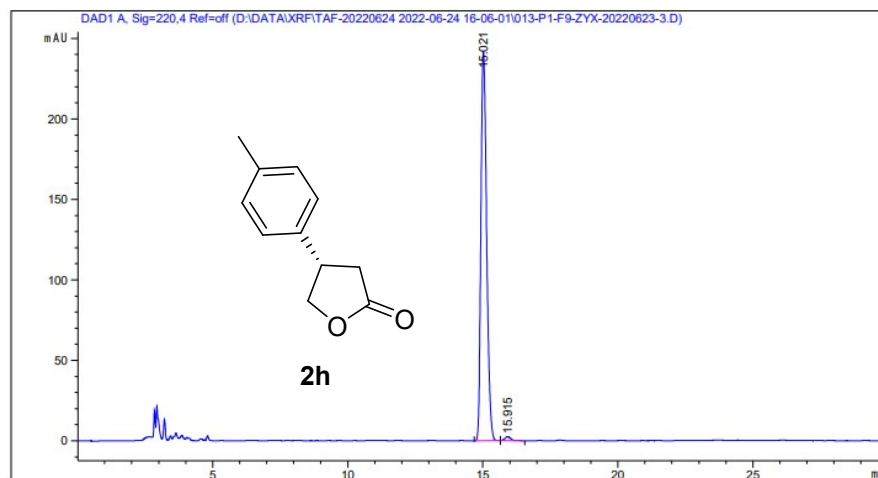

=====  
 Area Percent Report  
 =====

Sorted By : Signal  
 Multiplier : 1.0000  
 Dilution : 1.0000  
 Use Multiplier & Dilution Factor with ISTDs

Signal 1: DAD1 A, Sig=220,4 Ref=off

| Peak # | RetTime [min] | Type | Width [min] | Area [mAU*s] | Height [mAU] | Area %  |
|--------|---------------|------|-------------|--------------|--------------|---------|
| 1      | 15.021        | BB   | 0.2267      | 3544.67700   | 242.23021    | 98.9285 |
| 2      | 15.915        | BB   | 0.2237      | 38.39378     | 2.49202      | 1.0715  |

Totals : 3583.07079 244.72223

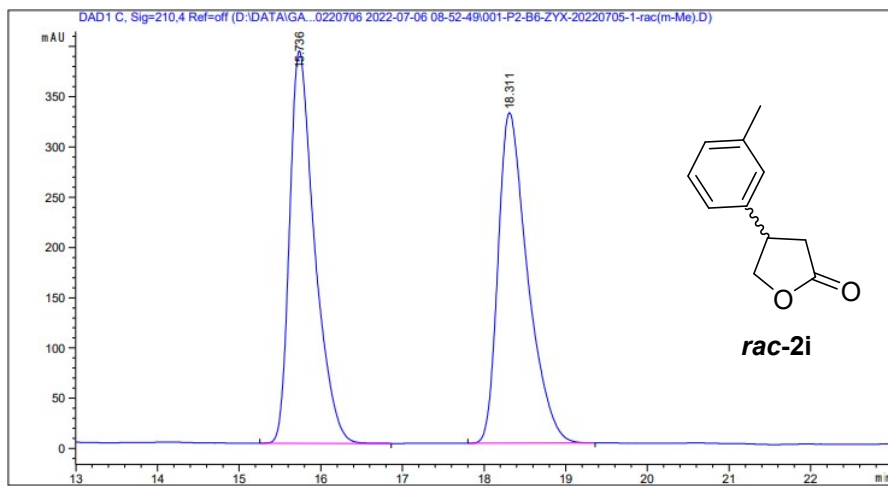

=====  
 Area Percent Report  
 =====

Sorted By : Signal  
 Multiplier : 1.0000  
 Dilution : 1.0000  
 Use Multiplier & Dilution Factor with ISTDs

Signal 1: DAD1 C, Sig=210,4 Ref=off

| Peak # | RetTime [min] | Type | Width [min] | Area [mAU*s] | Height [mAU] | Area %  |
|--------|---------------|------|-------------|--------------|--------------|---------|
| 1      | 15.736        | BB   | 0.3180      | 8296.78125   | 390.32135    | 50.0429 |
| 2      | 18.311        | BB   | 0.3759      | 8282.54004   | 328.78058    | 49.9571 |

Totals : 1.65793e4 719.10193

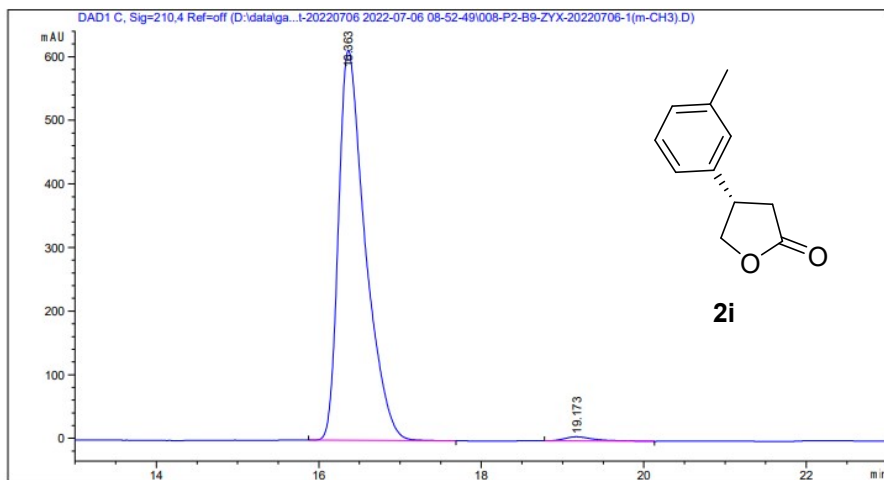

=====  
 Area Percent Report  
 =====

Sorted By : Signal  
 Multiplier : 1.0000  
 Dilution : 1.0000  
 Use Multiplier & Dilution Factor with ISTDs

Signal 1: DAD1 C, Sig=210,4 Ref=off

| Peak # | RetTime [min] | Type | Width [min] | Area [mAU*s] | Height [mAU] | Area %  |
|--------|---------------|------|-------------|--------------|--------------|---------|
| 1      | 16.363        | BB   | 0.3364      | 1.40025e4    | 613.20581    | 98.7841 |
| 2      | 19.173        | BB   | 0.3788      | 172.35622    | 6.55392      | 1.2159  |

Totals : 1.41749e4 619.75973

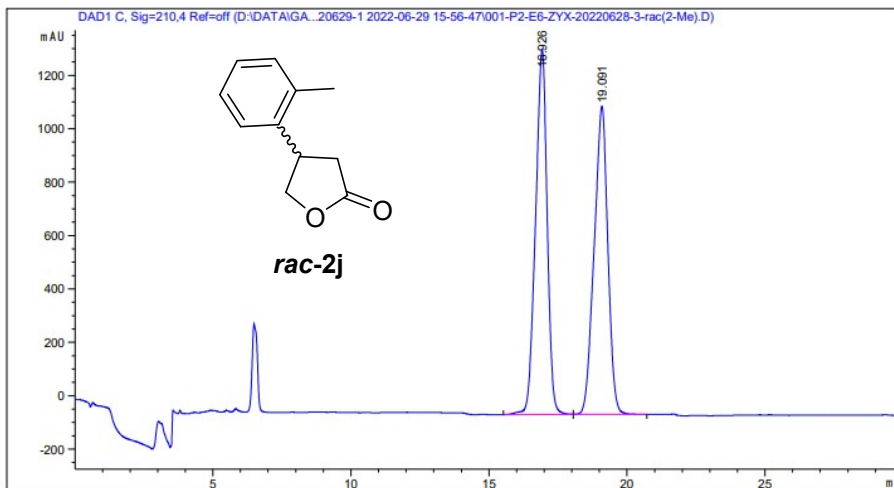

=====  
 Area Percent Report  
 =====

Sorted By : Signal  
 Multiplier : 1.0000  
 Dilution : 1.0000  
 Use Multiplier & Dilution Factor with ISTDs

Signal 1: DAD1 C, Sig=210,4 Ref=off

| Peak #   | RetTime [min] | Type | Width [min] | Area [mAU*s] | Height [mAU] | Area %  |
|----------|---------------|------|-------------|--------------|--------------|---------|
| 1        | 16.926        | BB   | 0.4296      | 3.99824e4    | 1365.42834   | 50.1658 |
| 2        | 19.091        | BB   | 0.4932      | 3.97180e4    | 1154.93848   | 49.8342 |
| Totals : |               |      |             | 7.97004e4    | 2520.36682   |         |

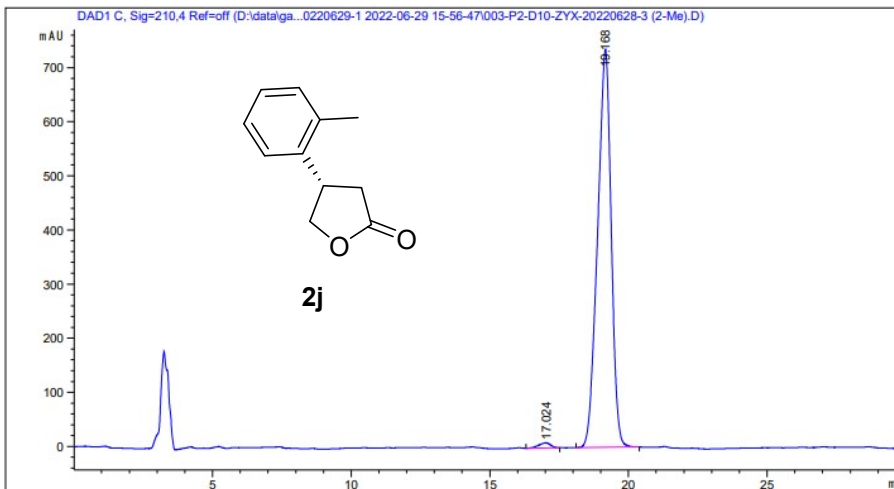

=====  
 Area Percent Report  
 =====

Sorted By : Signal  
 Multiplier : 1.0000  
 Dilution : 1.0000  
 Use Multiplier & Dilution Factor with ISTDs

Signal 1: DAD1 C, Sig=210,4 Ref=off

| Peak #   | RetTime [min] | Type | Width [min] | Area [mAU*s] | Height [mAU] | Area %  |
|----------|---------------|------|-------------|--------------|--------------|---------|
| 1        | 17.024        | BB   | 0.3902      | 283.76025    | 9.50735      | 1.1205  |
| 2        | 19.168        | BB   | 0.4972      | 2.50407e4    | 735.41461    | 98.8795 |
| Totals : |               |      |             | 2.53245e4    | 744.92196    |         |



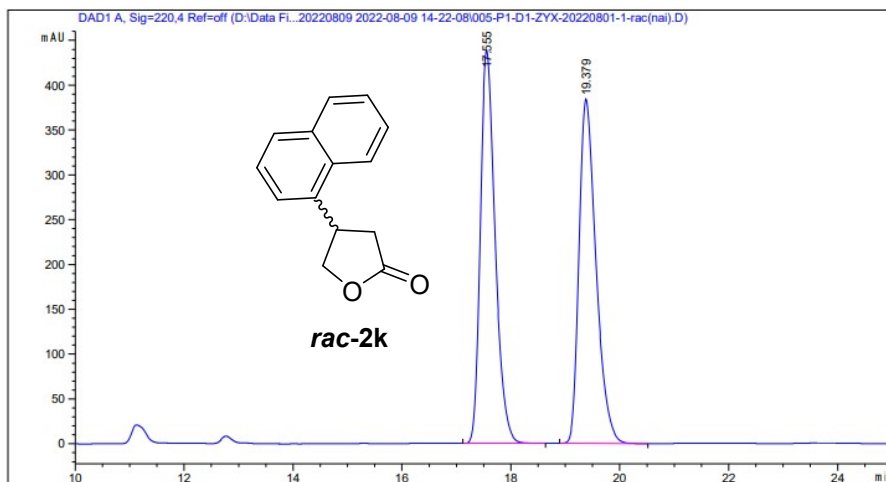

=====  
 Area Percent Report  
 =====

Sorted By : Signal  
 Multiplier : 1.0000  
 Dilution : 1.0000  
 Use Multiplier & Dilution Factor with ISTDs

Signal 1: DAD1 A, Sig=220,4 Ref=off

| Peak # | RetTime [min] | Type | Width [min] | Area [mAU*s] | Height [mAU] | Area %  |
|--------|---------------|------|-------------|--------------|--------------|---------|
| 1      | 17.555        | BB   | 0.2880      | 8259.22754   | 438.08722    | 49.7994 |
| 2      | 19.379        | BB   | 0.3329      | 8325.76270   | 384.14825    | 50.2006 |

Totals : 1.65850e4 822.23547

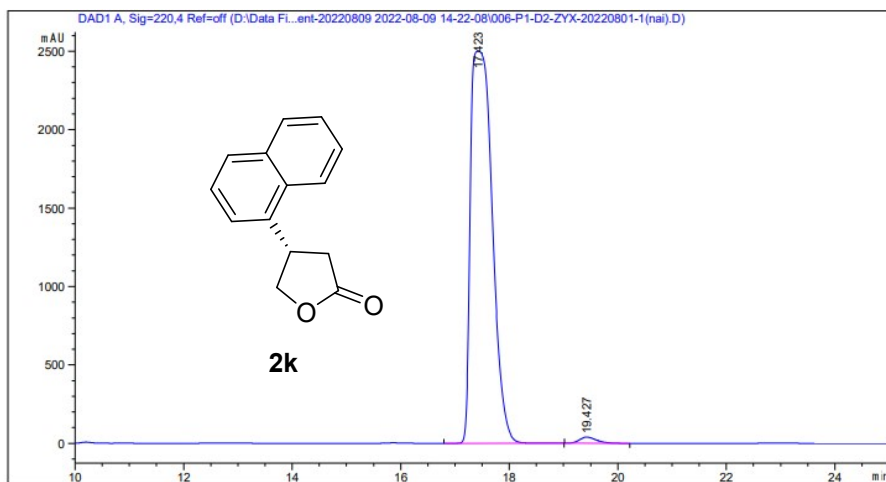

=====  
 Area Percent Report  
 =====

Sorted By : Signal  
 Multiplier : 1.0000  
 Dilution : 1.0000  
 Use Multiplier & Dilution Factor with ISTDs

Signal 1: DAD1 A, Sig=220,4 Ref=off

| Peak # | RetTime [min] | Type | Width [min] | Area [mAU*s] | Height [mAU] | Area %  |
|--------|---------------|------|-------------|--------------|--------------|---------|
| 1      | 17.423        | BB   | 0.4395      | 6.92752e4    | 2498.67554   | 98.7940 |
| 2      | 19.427        | BB   | 0.3259      | 845.62933    | 39.47557     | 1.2060  |

Totals : 7.01208e4 2538.15111

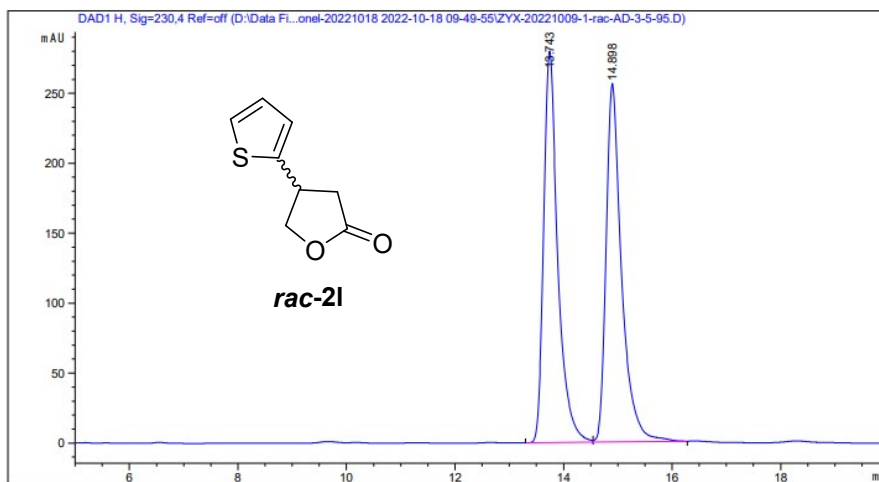

=====  
 Area Percent Report  
 =====

Sorted By : Signal  
 Multiplier : 1.0000  
 Dilution : 1.0000  
 Use Multiplier & Dilution Factor with ISTDs

Signal 1: DAD1 H, Sig=230,4 Ref=off

| Peak # | RetTime [min] | Type | Width [min] | Area [mAU*s] | Height [mAU] | Area %  |
|--------|---------------|------|-------------|--------------|--------------|---------|
| 1      | 13.743        | BV   | 0.2682      | 5039.24170   | 279.63739    | 49.8086 |
| 2      | 14.898        | VB   | 0.2953      | 5077.97314   | 256.12122    | 50.1914 |

Totals : 1.01172e4 535.75861

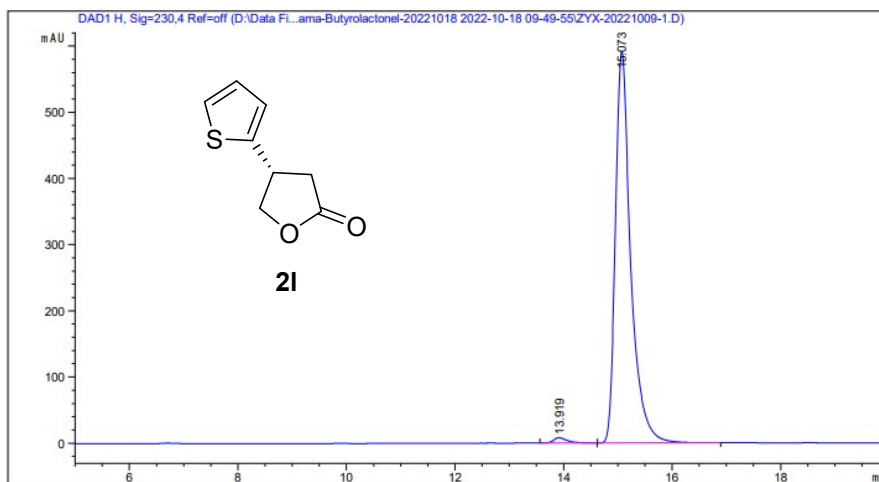

=====  
 Area Percent Report  
 =====

Sorted By : Signal  
 Multiplier : 1.0000  
 Dilution : 1.0000  
 Use Multiplier & Dilution Factor with ISTDs

Signal 1: DAD1 H, Sig=230,4 Ref=off

| Peak # | RetTime [min] | Type | Width [min] | Area [mAU*s] | Height [mAU] | Area %  |
|--------|---------------|------|-------------|--------------|--------------|---------|
| 1      | 13.919        | BB   | 0.2597      | 139.02673    | 7.96188      | 1.1913  |
| 2      | 15.073        | BB   | 0.2895      | 1.15308e4    | 591.36938    | 98.8087 |

Totals : 1.16698e4 599.33126

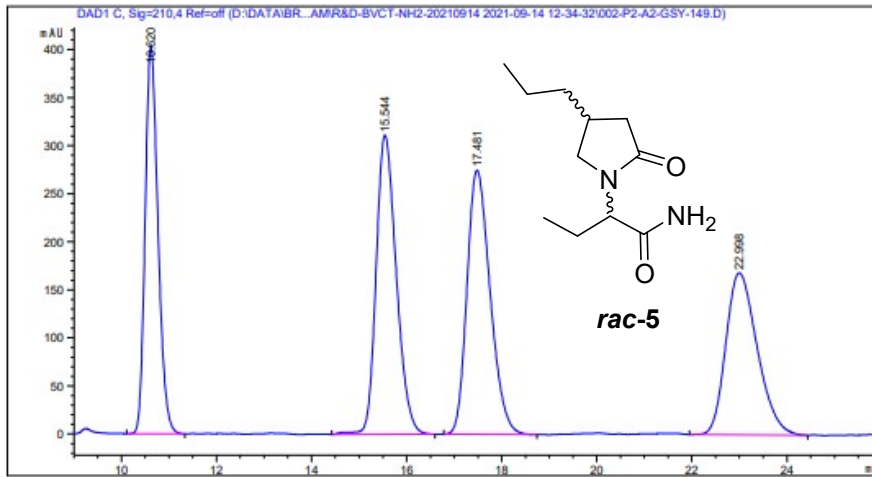

=====  
 Area Percent Report  
 =====

Sorted By : Signal  
 Multiplier : 1.0000  
 Dilution : 1.0000  
 Use Multiplier & Dilution Factor with ISTDs

Signal 1: DAD1 C, Sig=210,4 Ref=off

| Peak #   | RetTime [min] | Type | Width [min] | Area [mAU*s] | Height [mAU] | Area %  |
|----------|---------------|------|-------------|--------------|--------------|---------|
| 1        | 10.620        | BB   | 0.2917      | 7583.06348   | 402.76846    | 22.4521 |
| 2        | 15.544        | BB   | 0.4560      | 9170.25000   | 310.97925    | 27.1515 |
| 3        | 17.481        | BB   | 0.5269      | 9304.79492   | 274.87088    | 27.5499 |
| 4        | 22.998        | BB   | 0.7125      | 7716.27051   | 168.41872    | 22.8465 |
| Totals : |               |      |             | 3.37744e4    | 1157.03731   |         |

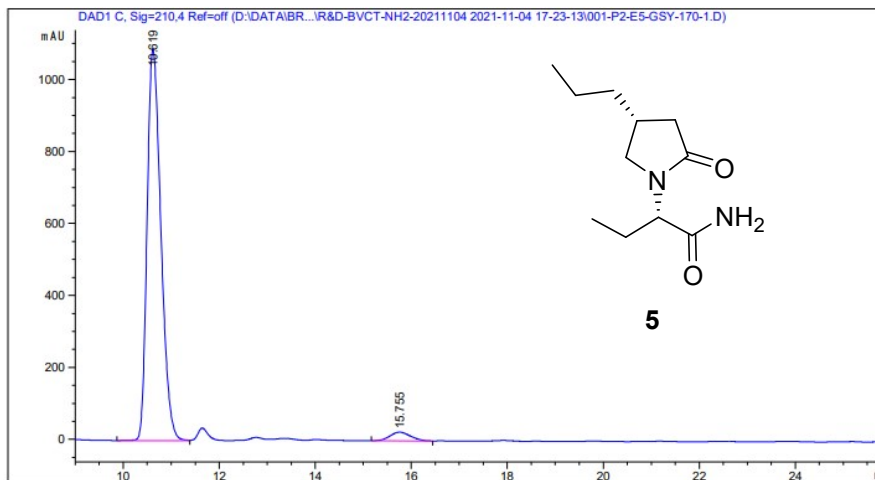

=====  
 Area Percent Report  
 =====

Sorted By : Signal  
 Multiplier : 1.0000  
 Dilution : 1.0000  
 Use Multiplier & Dilution Factor with ISTDs

Signal 1: DAD1 C, Sig=210,4 Ref=off

| Peak #   | RetTime [min] | Type | Width [min] | Area [mAU*s] | Height [mAU] | Area %  |
|----------|---------------|------|-------------|--------------|--------------|---------|
| 1        | 10.619        | BV   | 0.3102      | 2.16361e4    | 1086.85876   | 96.8609 |
| 2        | 15.755        | BB   | 0.4509      | 701.19250    | 23.85451     | 3.1391  |
| Totals : |               |      |             | 2.23373e4    | 1110.71328   |         |

## 8. GC Spectra

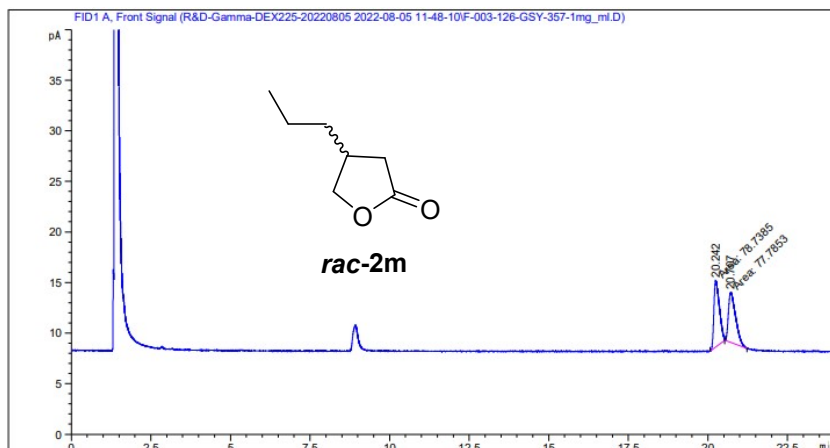

=====  
Area Percent Report  
=====

Sorted By : Signal  
Multiplier : 1.0000  
Dilution : 1.0000  
Use Multiplier & Dilution Factor with ISTDs

Signal 1: FID1 A, Front Signal

| Peak # | RetTime [min] | Type | Width [min] | Area [pA*s] | Height [pA] | Area %   |
|--------|---------------|------|-------------|-------------|-------------|----------|
| 1      | 20.242        | MM   | 0.1994      | 78.73846    | 6.58091     | 50.30449 |
| 2      | 20.707        | MM   | 0.2629      | 77.78526    | 4.93058     | 49.69551 |

Totals : 156.52372 11.51149

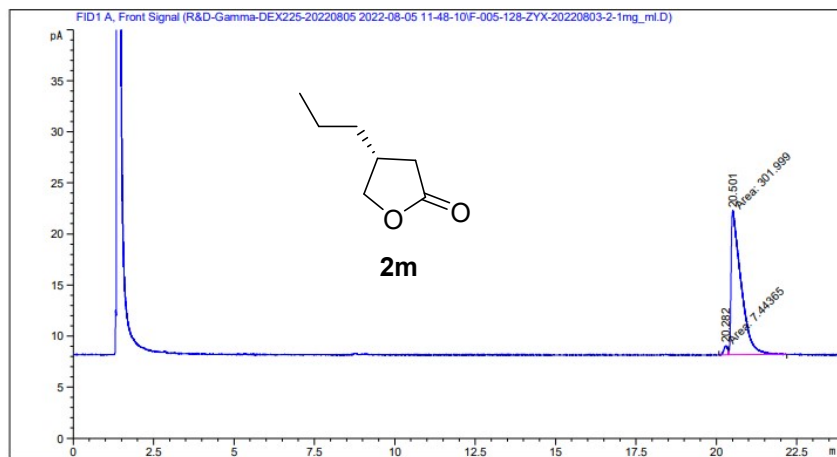

=====  
Area Percent Report  
=====

Sorted By : Signal  
Multiplier : 1.0000  
Dilution : 1.0000  
Use Multiplier & Dilution Factor with ISTDs

Signal 1: FID1 A, Front Signal

| Peak # | RetTime [min] | Type | Width [min] | Area [pA*s] | Height [pA] | Area %   |
|--------|---------------|------|-------------|-------------|-------------|----------|
| 1      | 20.282        | MF   | 0.1396      | 7.44365     | 8.88958e-1  | 2.40550  |
| 2      | 20.501        | FM   | 0.3572      | 301.99921   | 14.09239    | 97.59450 |

Totals : 309.44285 14.98135

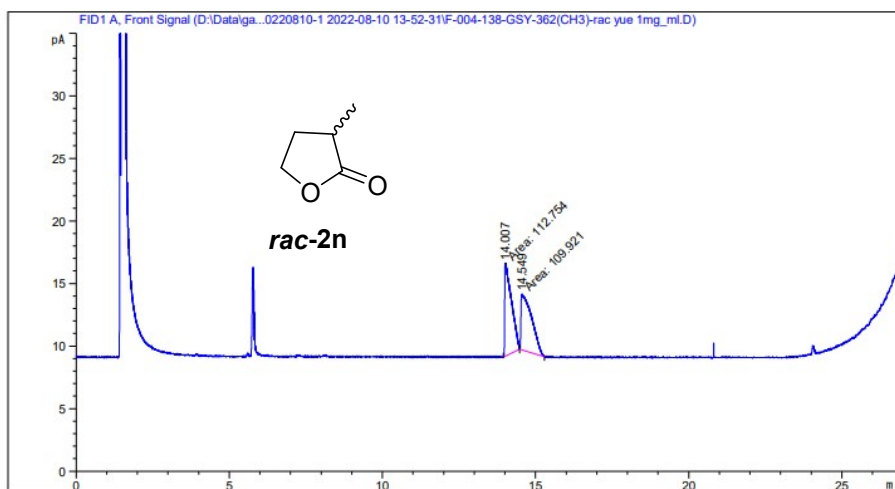

=====  
Area Percent Report  
=====

Sorted By : Signal  
Multiplier : 1.0000  
Dilution : 1.0000  
Use Multiplier & Dilution Factor with ISTDs

Signal 1: FID1 A, Front Signal

| Peak # | RetTime [min] | Type | Width [min] | Area [pA*s] | Height [pA] | Area %   |
|--------|---------------|------|-------------|-------------|-------------|----------|
| 1      | 14.007        | MM   | 0.2517      | 112.75397   | 7.46495     | 50.63622 |
| 2      | 14.549        | MM   | 0.4096      | 109.92059   | 4.47262     | 49.36378 |

Totals : 222.67456 11.93757

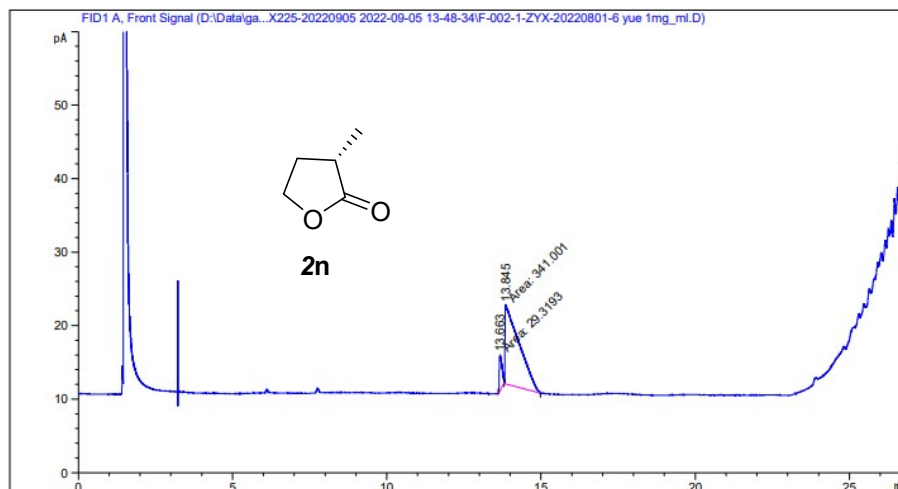

=====  
Area Percent Report  
=====

Sorted By : Signal  
Multiplier : 1.0000  
Dilution : 1.0000  
Use Multiplier & Dilution Factor with ISTDs

Signal 1: FID1 A, Front Signal

| Peak # | RetTime [min] | Type | Width [min] | Area [pA*s] | Height [pA] | Area %   |
|--------|---------------|------|-------------|-------------|-------------|----------|
| 1      | 13.663        | MM   | 0.0996      | 29.31932    | 4.90778     | 7.91728  |
| 2      | 13.845        | MM   | 0.5261      | 341.00116   | 10.80254    | 92.08272 |

Totals : 370.32048 15.71032

## 9. References

1. Bolchi, C.; Roda, G.; Pallavicini, M., *Synth. Commun.* **2018**, *48* (1), 85-90.
2. Hughes, G.; Kimura, M.; Buchwald, S. L., *J. Am. Chem. Soc.* **2003**, *125* (37), 11253-11258.
3. Tao, M.; Aimone, L. D.; Huang, Z.; Mathiasen, J.; Raddatz, R.; Lyons, J.; Hudkins, R. L., *J. Med. Chem.* **2012**, *55* (1), 414-423.
4. Wermuth, C. G.; Bourguignon, J. J.; Schlewer, G.; Gies, J. P.; Schoenfelder, A.; Melikian, A.; Bouchet, M. J.; Chantreux, D.; Molimard, J. C., *J. Med. Chem.* **1987**, *30* (2), 239-249.
5. Wu, J.; Zhu, Q.; Wang, L.; Fathi, R.; Yang, Z., *J. Org. Chem.* **2003**, *68* (2), 670-673.
6. Malkov, A. V.; Friscourt, F.; Bell, M.; Swarbrick, M. E.; Kočovský, P., *J. Org. Chem.* **2008**, *73* (11), 3996-4003.
7. You, C.; Li, S.; Li, X.; Lv, H.; Zhang, X., *ACS Catalysis* **2019**, *9* (9), 8529-8533.
8. Rečnik, L.-M.; Thatcher, R. J.; Mallah, S.; Butts, C. P.; Collingridge, G. L.; Molnár, E.; Jane, D. E.; Willis, C. L., *Org. Biomol. Chem.* **2021**, *19* (42), 9154-9162.
9. Oliveira, C. C.; Angnes, R. A.; Correia, C. R. D., *J. Org. Chem.* **2013**, *78* (9), 4373-4385.
10. Zhou, L.; Liu, X.; Ji, J.; Zhang, Y.; Hu, X.; Lin, L.; Feng, X.,

*J. Am. Chem. Soc.* **2012**, *134* (41), 17023-17026.

11. Kim, S.-G., *Tetrahedron Lett.* **2008**, *49* (42), 6148-6151.

12. Douglas, J. J.; Sevrin, M. J.; Stephenson, C. R. J., *Organic Process Research & Development* **2016**, *20* (7), 1134-1147.

13. Qabaja, G.; Wilent, J. E.; Benavides, A. R.; Bullard, G. E.; Petersen, K. S., *Org. Lett.* **2013**, *15* (6), 1266-1269.

14. Schülé, A.; Merschaert, A.; Szczepaniak, C.; Maréchal, C.; Carly, N.; O'Rourke, J.; Ates, C., *Organic Process Research & Development* **2016**, *20* (9), 1566-1575.
